# 1 The exocyst complex and intracellular vesicles mediate soluble 2 protein trafficking to the primary cilium

3 Niedziółka SM<sup>1,2</sup>, Datta S<sup>1</sup>, Uśpieński T<sup>1,2</sup>, Baran B<sup>1,2</sup>, Humke EW<sup>3,4</sup>, Rohatgi R<sup>3,5</sup>,  
4 Niewiadomski P<sup>1,\*</sup>

5 <sup>1</sup> Centre of New Technologies, University of Warsaw, Warsaw, Poland

6 <sup>2</sup> Faculty of Biology, University of Warsaw, Warsaw, Poland

7 <sup>3</sup> Department of Medicine, Stanford University School of Medicine, Stanford, CA, USA

8 <sup>4</sup> Current address: IGM Biosciences, Inc., Mountain View, CA, USA

9 <sup>5</sup> Department of Biochemistry, Stanford University School of Medicine, Stanford, CA, USA

10 \* Correspondence: [p.niewiadomski@cent.uw.edu.pl](mailto:p.niewiadomski@cent.uw.edu.pl)

## 11 Abstract

12 Efficient transport of proteins into the primary cilium is a crucial step for many signaling  
13 pathways. Dysfunction of this process can lead to the disruption of signaling cascades or cilium  
14 assembly, resulting in developmental disorders and cancer. Previous studies on ciliary  
15 trafficking were mostly focused on the membrane-embedded receptors. In contrast, how  
16 soluble proteins are delivered into the cilium is poorly understood. In our work, we identify  
17 the exocyst complex as a key player in the ciliary trafficking of soluble Gli transcription factors.  
18 Considering that the exocyst mediates intracellular vesicle transport, we demonstrate that  
19 soluble proteins, including Gli2/3 and Lkb1, can use the endosome recycling machinery for  
20 their delivery to the primary cilium. Finally, we identify GTPases: Rab14, Rab18, Rab23, and  
21 Arf4 involved in vesicle-mediated Gli protein ciliary trafficking. Our data pave the way for a  
22 better understanding of ciliary transport and uncover novel transport mechanisms inside the  
23 cell.

## 24 Introduction

25 Hedgehog (Hh) signaling is essential for embryonic patterning and organ morphogenesis<sup>1</sup>.  
26 Malfunctions of this pathway can lead to developmental disorders and cancer. The expression  
27 of Hh target genes is controlled by Gli transcription factors: Gli1 which acts as an activator,  
28 and Gli2/Gli3, which display both activator and repressor functions<sup>2</sup>.

29 Processing of Gli transcription factors to activator and repressor forms requires their efficient  
30 transport to the primary cilium, which integrates proteins necessary to a variety of Gli  
31 modifications<sup>3-8</sup>. Cilia are indispensable for the transduction of the Hh signal and the  
32 translocation of Gli activators into the nucleus<sup>9</sup>. In humans, defects in the ciliary function and  
33 the trafficking of ciliary proteins often result in developmental defects associated with the  
34 dysfunction of the Hh/Gli cascade.

35 Gli proteins are large and slowly diffusing proteins, so it is puzzling how they accumulate at  
36 the cilium within a mere few minutes upon signal reception<sup>10</sup>. This accumulation is a result of  
37 a three-step process: (1) targeted transport to the cilium base, (2) gated entry through a  
38 diffusion barrier, and (3) active trafficking along the cilium. The mechanisms of Gli transition  
39 across the diffusion barrier and the model of transport from the base to the tip are relatively

40 well-described<sup>11–13</sup>. However, it is still unclear how Gli proteins are delivered so quickly and  
41 precisely from the cytoplasm to the cilium base.

42 Most previous studies on protein delivery to the ciliary base were focused on membrane  
43 proteins. Three different transport routes have been described for their delivery from the  
44 Golgi complex to the primary cilium<sup>14</sup>. Some ciliary proteins first reach the plasma membrane  
45 and then move to the ciliary membrane by lateral transport<sup>15</sup>. Others reach the base of the  
46 cilium using regulated vesicular transport, either directly or through the recycling trafficking  
47 pathway<sup>16</sup>.

48 The process of protein trafficking to the primary cilium is supported by many players involved  
49 in endocytosis and the vesicle transport machinery<sup>17,18</sup>. Prominent among them are small  
50 GTPases, which act as molecular switches that allow for the guidance of their associated  
51 vesicles<sup>19–21</sup>. In addition to GTPases, the protein ciliary trafficking depends on several  
52 multiprotein complexes, such as the BBSome<sup>22,23</sup> and the exocyst<sup>24,25</sup>. The exocyst is a  
53 conserved protein complex that mediates the tethering of secretory vesicles to the plasma  
54 membrane<sup>26</sup>. It interacts with the ciliary transport machinery to transport transmembrane  
55 proteins necessary for ciliogenesis and signaling<sup>16,27,28</sup>.

56 In our quest to identify the molecular machinery that delivers Gli proteins to the cilium base,  
57 we performed a proteomic analysis of Gli3 interactors. Interestingly, among Gli3-binding  
58 proteins, we detected several exocyst subunits<sup>26</sup>. Loss-of-function assays show the  
59 dependence of Gli2 and Gli3 ciliary localization on the exocyst. Consistent with the role of this  
60 complex in vesicle trafficking, we show that Gli2 uses intracellular vesicles as trafficking  
61 vehicles. In addition, several small GTPases, including Rab14, Rab18, Rab23, and Arf4, regulate  
62 the ciliary transport of Gli2. Finally, we show that this vesicle-based transport machinery is  
63 used for the ciliary delivery of Lkb1, another soluble protein that concentrates at cilia.

## 64 Results

### 65 The exocyst complex interacts with Gli3

66 To identify proteins that help guide Gli proteins to the primary cilium, we immunoprecipitated  
67 proteins that interact with Gli3 in cells treated with the Smoothed (Smo) agonist SAG<sup>29</sup>.  
68 Cells were separated into “nuclear” and “cytoplasmic” fractions and then immunoprecipitated  
69 with anti-Gli3 antibodies. The eluates were separated using SDS-PAGE, and prominent bands  
70 were submitted for MS-based protein identification (Fig. 1A).

71 We identified 473 high confidence Gli3 interactors by rejecting frequent IP/MS contaminants  
72 based on the CRAPome database<sup>30</sup>. In this dataset, we found well-known Gli interaction  
73 partners, such as SuFu, Kif7, and Xpo7<sup>31–34</sup>. The dataset was enriched for proteins involved in  
74 intraciliary and vesicle transport, chromatin remodeling, and DNA repair (Fig. 1B) and  
75 contained components of multi-subunit ciliary transport complexes, including  
76 the BBSome and the exocyst (Fig. 1C, Supplementary Table S1).

77 Because exocyst, a multi-subunit protein complex involved in vesicle transport and docking<sup>35</sup>,  
78 had previously been implicated in the trafficking of proteins to primary cilia, we decided to  
79 focus on its components as potential mediators of the Gli proteins delivery to the cilium base.  
80 The exocyst has mostly been studied in the context of its binding to intracellular vesicles and  
81 the plasma membrane, but the subunits that were specifically enriched in the Gli3  
82 interactome are positioned away from the putative lipid-binding surface of the complex,  
83 consistent with Gli3 being a soluble, rather than a lipid-embedded protein (Fig. 1D).

84 In agreement with the proteomic data, Gli3, as well as Gli2, co-immunoprecipitate with Sec5  
85 (Fig. 2A). Moreover, Sec5 and Gli2 tightly colocalize in cells, as shown using the proximity  
86 ligation assay (Fig. 2B). Similarly, overexpressed Sec3, Sec5, and Sec8 interact with the  
87 constitutively active Gli2 mutants Gli2(P1-6A) (Fig. 2C, D)<sup>36</sup>. We decided to use Gli2(P1-6A) in  
88 most experiments because it localizes to cilia in the absence of upstream activation, allowing  
89 us to study its trafficking independently of the transport of membrane proteins regulating  
90 endogenous Gli proteins, such as Smo and Ptch<sup>37,38</sup>.

91 To identify the Gli2 domain responsible for interaction with the exocyst, we performed co-  
92 immunoprecipitation of Sec3/5/8 with the N-terminal domain of Gli2 and a construct lacking  
93 the N-terminus. The exocyst subunits interact with the N-terminus of Gli2 (HA-Gli2-N) but  
94 interact only weakly with Gli2(P1-6A)-ΔN (Fig. 2E, F).

### 95 Trafficking of Gli2 to cilia depends on the exocyst

96 Because the exocyst is required for the trafficking of some ciliary proteins, we hypothesized  
97 that the loss-of-function of the exocyst could impair Gli ciliary localization. To test this  
98 assertion, we knocked down individual exocyst subunits in cells expressing Gli2(P1-6A). Both  
99 shRNA- (Fig. 3A) and siRNA-mediated knockdown (Fig. 3B) of exocyst subunits resulted in a  
100 significant reduction of Gli2(P1-6A) ciliary localization (Fig. 3C and D).

101 Similarly, mislocalization of Sec5 using the mitochondrial trap<sup>39</sup> impairs the ciliary trafficking  
102 of Gli2(P1-6A). We fused Sec5 with the mitochondrial protein Tom20 and mScarlet and co-  
103 expressed the resulting Tom20-mScarlet-Sec5 construct with Gli2(P1-6A) (Fig. 4A). We

104 observed a reduced Gli2 ciliary level in cells overexpressing the Tom20-mScarlet-Sec5  
105 mitochondrial trap, compared to those overexpressing two negative control constructs –  
106 Tom20-mScarlet and mScarlet-Sec5 (Fig. 4B).

107 Finally, the exocyst inhibitor endosidin2 reduces Gli2(P1-6A) ciliary localization in the stable  
108 cell line after just two hours of treatment (Fig. 4C).

109 Because the exocyst binds to Gli2 mostly via its N-terminal domain (Fig 2E, F), we suspected  
110 that removing the N-terminus would impair Gli2 ciliary accumulation. Accordingly, we  
111 observed a strong reduction of the Gli2(P1-6A)- $\Delta$ N mutant localization in the primary cilium  
112 compared to the full-length protein (Fig. 4D).

113 Having demonstrated that the exocyst is required for the trafficking of Gli to cilia, we  
114 wondered if the localization of the exocyst is affected by Hh pathway activation. Indeed, the  
115 treatment with SAG increases the amount of Sec3 and Sec5 at the ciliary base suggesting that  
116 the exocyst is co-transported with Gli proteins upon pathway activation (Fig. 4E).

### 117 Gli2 associates with intracellular vesicles

118 While the best-known role of the exocyst complex is the transport of vesicle-embedded  
119 membrane proteins, our results suggest that soluble cytoplasmic Gli proteins may also use the  
120 exocyst as a vehicle for intracellular trafficking. We, therefore, wondered if Gli proteins use  
121 vesicles for their transport into the cilium. To verify this hypothesis, we used super-resolution  
122 AiryScan microscopy to image cells co-expressing HA-Gli2(P1-6A) and EGFP-Sec5, and  
123 surprisingly, we observed Gli2 around Sec5-positive vesicle-like structures. It suggests that  
124 Gli2 could accumulate on the surface of vesicles, where it could interact directly with the  
125 exocyst (Fig. 5A).

126  
127 We also looked at Gli2 localization by immunogold electron microscopy. In HEK293T cells  
128 overexpressing EGFP-Gli2(P1-6A), we observed EGFP-positive clusters adjacent to membrane  
129 vesicle-like structures (Fig. 5B).

130 To check if Gli-positive structures represent intracellular vesicles, we isolated vesicles using  
131 cell fractionation. HA-Gli2(P1-6A), endogenous Gli3, and Sec5 co-fractionated with the  
132 endosome marker EEA1 in the endosomal fraction. ERK was used as the cytoplasmic control  
133 marker. The total abundance of proteins in fractions we showed by silver staining (Fig. 5C).

134 The most likely explanation for our results is that Gli proteins are transported on the surface  
135 of vesicles towards the ciliary base. The two potential sources of these vesicles are the Golgi  
136 apparatus via the exocytic pathway<sup>40,41</sup> and the plasma membrane by endocytosis<sup>42–44</sup>. Firstly,  
137 we inhibited endocytosis using two inhibitors: dynasore<sup>45</sup> and pitstop2<sup>46</sup> in cells expressing  
138 constitutively active Gli2. Surprisingly, after 2h of dynasore treatment, we observed an almost  
139 complete inhibition of Gli2 ciliary accumulation. This effect was independent of Smo because  
140 treatment with two Smo inhibitors cyclopamine and vismodegib did not affect the Gli2(P1-6A)  
141 ciliary level (Fig. 5E and Fig. S2).

142 If the dynasore effects are a consequence of the reduced rate of new vesicle formation, we  
143 would expect these effects to be fully reversible once the proper formation of vesicles is

144 restored. We used a pulse-chase assay with 2h vismodegib + dynasore treatment, and then  
145 we washed out dynasore from the media and collected cells at several time points. We  
146 observed a clear recovery of Gli2 ciliary transport within 1h from the dynasore washout (Fig.  
147 5D).

148 We also used another inhibitor of endocytosis – pitstop2. Because of its lethal effect on  
149 NIH3T3 fibroblasts in less than 30min, we treated cells with pitstop2 for 15 min, followed by  
150 a 30min incubation without the drug. Similar to the dynasore effects, we observed a decrease  
151 of Gli2 ciliary level in pitstop2-treated cells (Fig. 5F).

152 To determine if the vesicle transport from the cis-Golgi was also important for Gli2 ciliary  
153 trafficking, we treated stable HA-Gli2(P1-6A) cells with brefeldin A, a Golgi-disrupting drug<sup>47</sup>.  
154 We did not observe changes in Gli2 ciliary localization after 2h treatment (Fig. 5G).

155 The stimulation of target gene transcription by Gli2 is enhanced by its localization at the  
156 cilium<sup>9,48</sup>. We expected that dynasore would inhibit Hh target gene transcription in cells stably  
157 expressing the Gli2(P1-6A). Indeed, the expression of the Hh target gene Gli1 was decreased  
158 after dynasore treatment, although the expression of HA-Gli2(P1-6A) was unchanged (Fig. 5H).

#### 159 Rab and Arf proteins mediate Gli2 transport

160 The trafficking of vesicles in cells is guided by the reversible association of small GTPases,  
161 especially from the Rab and Arf families<sup>18,49</sup>. Because their association with vesicles and  
162 associated proteins is transient, we hypothesized that under the stringent conditions of our  
163 initial co-IP/MS, the Gli-associating GTPases may have been washed away from the bait  
164 protein. Thus, we performed another co-IP/MS, with less stringent detergents, using HA-  
165 Gli2(P1-6A) as bait in cells that either had normal cilia or were devoid of cilia by means of  
166 overexpression of a dominant-negative mutant Kif3a motor<sup>50</sup>. We expected the GTPases  
167 promoting Gli ciliary trafficking to be associated with Gli2 in ciliated, but not in unciliated cells  
168 (Fig. 6A).

169 We identified 200 high-confidence interactors (<10% FDR in the CRAPome database) including  
170 the same well-known regulators of Gli, such as SuFu, Kif7, Xpo7, and Spop<sup>34,32,51,52</sup>, as well as  
171 component proteins of the cilium and basal body (Fig. 6B, Supplementary Table S2). Among  
172 proteins associated with Gli2(P1-6A) in ciliated cells were Rab14, Rab5c, Rab11b, Rab18, and  
173 Arf4 (Fig. 6C). In addition, we tested two other Rab-family GTPases: the well-known Hh  
174 regulator Rab23<sup>53–55</sup> and Rab8, which cooperates with the exocyst<sup>56,57</sup>.

175 Initially, we established by co-IP that Rab14, Rab18, Rab23, and Arf4 proteins interact with  
176 Gli2(P1-6A) (Fig. 7A). In contrast, two Rab GTPases that had been implicated in ciliary  
177 trafficking of membrane proteins: Rab8 and Rab11a, do not strongly bind to Gli2(P1-6A) (Fig.  
178 S3A).

179 Subsequently, we performed loss-of-function experiments using shRNA and CRISPR/Cas9  
180 mutagenesis. The knockdown of Rab14, Rab18, and Arf4 caused the reduction of the Gli2(P1-  
181 6A) ciliary level (Fig. 7B-D). Likewise, the CRISPR/Cas9-mediated Rab14, Rab18, and Rab23  
182 knockout also significantly decreased the Gli2(P1-6A) ciliary accumulation (Fig. 7E). Moreover,  
183 we engineered cell lines expressing dominant-negative Rab23S51N and Arf4T31N mutants

184 from doxycycline-inducible promoters. Consistent with shRNA- and CRISPR/Cas9-based  
185 experiments, we observed a significant decrease of Gli2(P1-6A) ciliary accumulation in cells  
186 expressing Arf4 and Rab23 mutants(Fig.7F).

### 187 [The trafficking of Lkb1, but not Ubxn10, depends on endocytosis and the exocyst](#)

188 To establish if the mechanism of transport to cilia by endocytic vesicles is unique to Gli  
189 proteins or more common, we imaged several HA or GFP tagged soluble ciliary candidate  
190 proteins: HA-Dvl2<sup>58</sup>, Kap3a-EGFP<sup>59</sup>, HA-Lkb1<sup>60</sup>, HA-Mek1<sup>61</sup>, HA-Nbr1<sup>62</sup>, HA-Raptor<sup>63</sup>, Tbx3-  
191 GFP<sup>64</sup>, and Ubxn10-GFP<sup>65</sup>. Only two proteins clearly localized at cilia in NIH/3T3: Ubxn10-GFP,  
192 and HA-Lkb1 (Fig. 8A and Fig. S4).

193 To examine if the ciliary serine-threonine kinase Lkb1 uses an analogous transport mechanism,  
194 we treated stable expressing HA-Lkb1 cells with dynasore and observed decreased Lkb1 ciliary  
195 level (Fig. 8D). Similar to Gli2, ciliary accumulation of HA-Lkb1 also dropped after the shRNA  
196 knockdown of Sec3/5/8 (Fig. 8B). Accordingly, we detected HA-Lkb1 in the endosomal fraction  
197 (Fig. 7G). Finally, we observed using co-IP that Lkb1 binds to the exocyst subunits (Fig. 8F).

198 Another soluble ciliary protein that we studied was Ubxn10. Dynasore treatment did not  
199 negatively affect the ciliary trafficking of Ubxn10-GFP (Fig. 8E). Unlike for Gli2(P1-6A), we  
200 observed no effect of Sec5 knockdown on Ubxn10 ciliary localization (Fig. 8C). Consistent with  
201 these results, we detected Ubxn10 predominantly in the cytosolic cell fraction (Fig. 8H).

202

## 203 Discussion

204 The cilium is an essential organelle that relays environmental signals to the nucleus.  
205 Nevertheless, the mechanism of the signaling protein delivery to cilia is still poorly  
206 understood, especially for soluble proteins. To gain a better understanding of cytoplasmic  
207 proteins' transport to cilia we studied Gli transcription factors, large soluble proteins that  
208 accumulate at the tip of the cilium before their conversion into transcriptional activators<sup>5,9,11</sup>.

209 Using proteomic screening, we found that Gli proteins interact with the exocyst, a complex  
210 implicated in ciliary delivery of membrane receptors<sup>16,35</sup>. We found that loss-of-function of  
211 the exocyst by RNAi, mitochondrial trap, or drug treatment decreases ciliary localization of  
212 the constitutively active mutant Gli2(P1-6A) independently of their effect on transmembrane  
213 Hh signaling proteins Ptch and Smo.

214 On a molecular level, we show that the N-terminal region of Gli proteins binds to the  
215 subcomplex I of the exocyst<sup>26,66</sup>. This agrees with our data and published reports suggesting  
216 agree that the N-terminal domain is necessary for the Gli proteins ciliary accumulation<sup>5,9,11</sup>.  
217 The N-terminus is, however, not sufficient for Gli ciliary transport, with other domains,  
218 particularly the central domain of Gli2/3<sup>5,9</sup> likely participating in other stages of ciliary  
219 translocation.

220 Our results suggest that soluble cytoplasmic proteins, like Gli2/3, can use the exocyst as a  
221 vehicle for intracellular trafficking. The exocyst was shown to collaborate with the BLOC-1  
222 complex and IFT20 in the transport of membrane proteins polycystin-2 and fibrocystin to  
223 cilia<sup>16</sup>. However, IFT20 does not interact with HA-Gli2(P1-6A) (Fig. S3A). This suggests that the  
224 exocyst may mediate Gli protein ciliary trafficking independently of IFT20, which implies that  
225 the pathways directing membrane and soluble cilium components are somewhat divergent.  
226 Importantly, the exocyst can be transported to the cilium despite IFT20 loss-of-function<sup>16</sup>.

227 Consistent with the requirement of the exocyst in the transport of Gli2 to cilia, it appears that  
228 Gli2 is associated, at least transiently, with intracellular vesicles. Interestingly, the subunits of  
229 the exocyst that most strongly interact with Gli2 are positioned away from the putative lipid-  
230 facing surface of the complex<sup>26,66</sup>, indicating that the exocyst may form a tether between  
231 vesicle lipids and soluble proteins. Structural ciliary proteins had been previously found to be  
232 attached to the outer surfaces of intracellular vesicles carrying ciliary membrane proteins in  
233 *Chlamydomonas*<sup>67</sup>. We now provide functional data that corroborate and extend these  
234 findings. Protein delivery by vesicles to the cilium is persistent and essential for maintaining  
235 proper cilium function and structure<sup>68,69</sup>. Thus, the strategy of using vesicles as universal  
236 carriers of proteins, both soluble and membrane-embedded, to cilia, solves the logistical  
237 problem of homing many protein classes onto the tiny cilium base.

238 The trafficking of vesicles in cells is coordinated by the small GTPases from the Rab and Arf  
239 families. Intriguingly, we found that Rab14, Rab18, Rab23, and Arf4, interact with Gli2 and are  
240 essential for its accumulation in the ciliary compartment. The Rab14 GTPase localizes at early  
241 endosomes and plays a role in protein exchange between the endosomes and the Golgi  
242 compartment<sup>70-73</sup>, and exocytic vesicle targeting<sup>74</sup>. On the other hand, Rab18 is usually  
243 associated with the endoplasmic reticulum and lipid droplets<sup>75,76</sup>. Intriguingly, we identify

244 COPI and TRAPP complex components in Gli2(P1-6A) and Gli3 interactomes, and these  
245 complexes have been implicated in lipid droplet recruitment of Rab18<sup>77</sup>. This suggests that Gli  
246 may recruit Rab18 via TRAPPII and COPI to promote ciliary trafficking. Interestingly, all three  
247 of the above GTPases: Rab18, Rab14, and Arf4, were recently identified as proximity  
248 interactors of the cilium base-localized kinase Ttbk2<sup>78</sup>, strengthening the case for their  
249 involvement in the targeting of Gli-laden vesicles to the cilium.

250 Finally, Rab23 had previously been implicated in Hh signaling and ciliary transport of  
251 receptors<sup>79</sup>. Rab23 is described as a negative regulator of the Hh pathway but several different  
252 mechanisms have been proposed, from affecting Smo to directly regulating Gli proteins<sup>54,80,53</sup>.  
253 Here, we propose Rab23 as one of the key players in the trafficking of Gli transcription factors  
254 into the primary cilium. This is consistent with the recently discovered role of Rab23 in the  
255 transport of another soluble protein, Kif17, to primary cilia and with the ciliary and early  
256 endosome enrichment of Rab23<sup>81,82</sup>.

257 In addition to Rab family GTPases, we found Gli2 to associate with Arf4, which functions in  
258 sorting ciliary cargo at the Golgi and is a crucial regulator of ciliary receptor trafficking<sup>83,84</sup>.  
259 Arf4 binds the ciliary targeting signal of rhodopsin and controls the assembly of the Rab11a-  
260 Rabin8-Rab8 module for the proper delivery of cargo to the ciliary base<sup>85</sup>. Although Rab8 and  
261 Rab11a were found to cooperate with both the exocyst and Arf4<sup>85</sup> in the targeting of ciliary  
262 cargos, we found that the expression of dominant-negative Rab8 and Rab11a did not  
263 negatively affect Gli2 ciliary accumulation, with Rab8 DN actually promoting higher Gli2  
264 accumulation in cilia (Fig. S3B). Moreover, we did not find Rab8 or Rab11a among interactors  
265 of Gli2 and Gli3. Instead, among Gli2 interactors was a Rab11a ortholog Rab11b, which had  
266 also been implicated in ciliogenesis and found to associate with Rab8<sup>86,87</sup>. Disentangling the  
267 roles of the two Rab11 orthologs as well as Rab8/Rabin8 in the trafficking of soluble ciliary  
268 components will be an interesting subject for future studies.

269 Many of the implicated Rab/Arf proteins had been known to associate both with Golgi-derived  
270 exocytic vesicles and with plasma membrane-derived endosomes. To decipher the relative  
271 importance of these two potential vesicle sources, we used pharmacological inhibitors to  
272 show that Gli2 is likely delivered to cilia via endocytic vesicle trafficking rather than the  
273 canonical secretory pathway.

274 In addition to Gli2, other soluble ciliary proteins can adopt a similar transport mechanism.  
275 Specifically, we show that Lkb1 levels at primary cilia drop upon exocyst loss-of-function and  
276 inhibition of endocytosis. Like Gli2, Lkb1 associates with intracellular vesicles and interacts  
277 with the exocyst. In contrast, another soluble ciliary component Ubxn10 localizes at the cilium  
278 normally in cells depleted of Sec5 or treated with dynasore. This suggests that while the  
279 vesicle-mediated transport is important for the ciliary localization of some cytoplasmic  
280 proteins, others use different routes of ciliary trafficking.

281 In summary, we describe a novel mechanism for the transport of soluble cytoplasmic proteins  
282 to primary cilia, which relies on the association of these proteins with dynamically cycling  
283 endocytic vesicles. While we identify several key players in the ciliary trafficking of these  
284 vesicles, further work will dissect the precise sequence of events that are involved in this



285 process. In particular, it will be interesting to discover potential similarities and differences  
286 between the canonical ciliary targeting pathways for membrane proteins, such as polycystin  
287 2, fibrocystin, Smo, and rhodopsin with those described here for soluble ciliary proteins. Our  
288 work brings us closer to gaining a broad understanding of ciliary trafficking and the  
289 coordinated transport of proteins among membrane compartments.

## 290 Acknowledgments

291 We would like to thank Marta Międzyńska, Małgorzata Maksymowicz, Jarosław Cendrowski,  
292 and the members of the CeNT Bio PI discussion group, and the Laboratory of Molecular and  
293 Cellular Signalling for insightful discussion and helpful suggestions. We thank M. Raman, A.  
294 Moon, and P. Avasthi for sharing their reagents with us and Addgene contributors for making  
295 their plasmids available (see Table 1). This work was supported by the following grants from  
296 the National Science Centre (NCN): SONATA BIS 2014/14/E/NZ3/00033 and PRELUDIUM  
297 2018/29/N/NZ3/01523.

298

## 299 Materials and methods

### 300 Constructs and molecular cloning

301 Gli2/3 constructs were cloned based on the Gli2(P1-6A) mutant previously described<sup>36</sup> tagged  
302 with the N-terminal 3xHA. Initially, Gli2 fragments were amplified by PCR and then cloned into  
303 the pENTR2B (Life Technologies) vector by Gibson assembly<sup>88</sup> using the NEBuilder<sup>®</sup> HiFi DNA  
304 Assembly Master Mix (NEB). Subsequently, the constructs were shuttled into pEF/FRT/V5-  
305 DEST (Life Technologies) using the Gateway method (Gateway LR Clonase II mix; Life  
306 Technologies). Plasmids with Sec3/5/8, Rab8/11/14/18, and Arf4 on the pEGFP vector were  
307 ordered from the Addgene site (Tab. 1). Rab23 wild type and mutant cDNA sequences were  
308 obtained by DNA synthesis (DNA Strings; Thermo) and cloned by Gibson assembly into the  
309 LT3GEPiR plasmid ordered from addgene (Tab. 1). Tom20 sequence was amplified from mouse  
310 cDNA and then fused with mScarlet cloned from pmScarlet (addgene, Tab. 1) and Sec5 by  
311 Gibson assembly in the pEGFP-C3 vector with the EGFP sequence removed by restriction  
312 digestion. Other soluble proteins sequences of Dvl2, Nbr1, Mek1, Lkb1, Raptor were amplified  
313 from mouse cDNA and cloned into the pENTR2B with 3xHA tag vector by Gibson assembly.  
314 Ubx10 was cloned from pHAGE-NGFP-UBXD3 - gift from M. Raman<sup>65</sup>. Tbx3 was cloned from  
315 the construct with Tbx3-Myc - a gift from A. Moon<sup>64</sup>. pEGFP-Kap3a was a gift from P. Avasthi  
316 and pEGFP-Rab11a was a gift from M. Miaczynska.

317 Tab. 1. Plasmids used in our experiments ordered from the addgene site

|    | Plasmid name                | Addgene No. | Gift from         | References  |
|----|-----------------------------|-------------|-------------------|-------------|
| 1  | pEGFP-C3-Sec3               | #53755      | Channing Der      | 89          |
| 2  | pEGFP-C3-Sec5               | #53756      | Channing Der      | 89          |
| 3  | pEGFP-C3-Sec8               | #53758      | Channing Der      | 89          |
| 4  | pmScarlet_C1                | #85042      | Dorus Gadella     | 90          |
| 5  | pLKO.1 - TRC cloning vector | #10878      | David Root        | 91          |
| 6  | pLKO.1 - blast              | #25566      | Keith Mostov      | 92          |
| 7  | lentiCas9-Blast             | #52962      | Feng Zhang        | 93          |
| 8  | LT3GEPiR                    | #111177     | Johannes Zuber    | 94          |
| 9  | lentiGuide-Puro             | #52963      | Feng Zhang        | 93          |
| 10 | pRSV-Rev                    | #12253      | Didier Trono      | 95          |
| 11 | pMDLg/pRRE                  | #12251      | Didier Trono      | 95          |
| 12 | pMD2.G                      | #12259      | Didier Trono      | unpublished |
| 13 | EGFP-Rab14                  | #49549      | Marci Scidmore    | 96          |
| 14 | EGFP-Rab18                  | #49550      | Marci Scidmore    | 96          |
| 15 | Arf4-GFP                    | #39556      | Paul Melancon     | 97          |
| 16 | pCAG/hArf4(T31N)-HA         | #79405      | Kazuhisa Nakayama | 98          |
| 17 | GFP-rab11 DN                | #12678      | Richard Pagano    | 99          |
| 18 | pGFP-Rab8A                  | #24898      | Maxence Nachury   | 100         |
| 19 | pGFP-Rab8A[T22N]            | #24899      | Maxence Nachury   | 100         |
| 20 | pLenti-IFT20-EGFP           | #118032     | Ken Ichi Takemaru | unpublished |

## 318 Cell culture

319 HEK293T (ATCC) and NIH/3T3 Flp-In (Thermo) cells were maintained in media composed of  
320 DMEM (high glucose; Biowest), sodium pyruvate (Thermo), stable glutamine (Biowest), non-  
321 essential amino acids (Thermo), 10% fetal bovine serum (EurX), and penicillin/streptomycin  
322 solution (Thermo). HA-Gli2(P1-6A) and HA-LKB1 NIH3T3 stable cell lines were generated using  
323 the Flp-In system according to the manufacturer's protocols (Thermo Fisher). Stable cell lines  
324 were reselected with hygromycin on every other passage to preserve selection pressure.

325 To stimulate ciliogenesis the cells were cultured in the same medium but containing 0.5% FBS  
326 for 24h before fixing. For activation of the Hh pathway, we used SAG (Smoothed agonist)  
327 treatment 200nM for 24h. Transient transfections of cells we performed using the JetPrime  
328 reagent (Polyplus) according to the manufacturer's protocol.

329 All inhibitors were suspended in DMSO and used with indicated times. The following  
330 concentrations of inhibitors were used: dynasore (40 $\mu$ M, Sigma), endosidin2 (200 $\mu$ M, Sigma),  
331 pitstop2 (30 $\mu$ M, Sigma), brefeldin A (5 $\mu$ g/ml, Sigma).

## 332 Large scale co-IP/MS on Gli3

333 NIH/3T3 cells were cultured to confluence on 50 15cm dishes and starved overnight to  
334 promote ciliogenesis. They were treated with 100nM SAG for 4h. The cells were fractionated  
335 into nuclear and cytoplasmic fractions as previously described<sup>101</sup>. Each fraction was  
336 immunoprecipitated overnight with 150 $\mu$ L Dynabeads-Protein G (Invitrogen) covalently cross-  
337 linked with goat-anti-Gli3 (AF3690; R&D Systems; 30 $\mu$ g antibody per fraction). The beads were  
338 washed with the following buffers: harsh RIPA lysis buffer (50mM Tris pH 7.4, 150mM NaCl,  
339 2% Nonidet P-40, 500mM LiCl, 1mM DTT, 0.25% sodium deoxycholate, 0.1% SDS, protease  
340 and phosphatase inhibitors), RIPA lysis buffer supplemented with 0.8M urea, and mild 0.1%  
341 NP-40 lysis buffer (50mM Tris pH 7.4, 150mM NaCl, 0.1% Nonidet P-40, 1mM DTT, 1% glycerol,  
342 phosphatase inhibitors). The samples were eluted from beads using preheated 2x Laemmli  
343 sample buffer without DTT at 85°C for 5 min. The samples were then reduced and alkylated  
344 using DTT and iodoacetamide and loaded onto a 6% SDS-PAGE gel. The gel was stained using  
345 the GelCode Blue reagent (Pierce) and prominent bands were excised using a sterile scalpel  
346 and submitted for further processing to MS Bioworks (Ann Arbor, MI). The bands were  
347 destained and subjected to in-gel digest using trypsin. Each gel digest was analyzed by nano  
348 LC/MS/MS with a Waters NanoAcquity HPLC system interfaced to a ThermoFisher LTQ  
349 Orbitrap Velos. Peptides were loaded on a trapping column and eluted over a 75 $\mu$ m analytical  
350 column at 350nL/min; both columns were packed with Jupiter Proteo resin (Phenomenex).  
351 The mass spectrometer was operated in data-dependent mode, with MS performed in the  
352 Orbitrap at 60,000 FWHM resolution and MS/MS performed in the LTQ. The fifteen most  
353 abundant ions were selected for MS/MS. Data were searched using a local copy of Mascot  
354 with the following parameters: Enzyme: Trypsin, Database: IPI Mouse v3.75 (forward and  
355 reverse appended with common contaminants), Fixed modification: Carbamidomethyl (C),  
356 Variable modifications: Oxidation (M), Acetyl (N-term, K), Pyro-Glu (N-term Q), Deamidation  
357 (N,Q), Phospho (S,T,Y), GlyGly (K), Mass values: Monoisotopic, Peptide Mass Tolerance: 10  
358 ppm, Fragment Mass Tolerance: 0.5 Da, Max Missed Cleavages: 2. Mascot DAT files were  
359 parsed into the Scaffold algorithm for validation, filtering, and to create a nonredundant list

360 per sample. Data were filtered using a minimum protein value of 90%, a minimum peptide  
361 value of 50% (Prophet scores), and requiring at least two unique peptides per protein.

362 To determine high-confidence Gli3 interactors, we rejected all proteins found in more than  
363 10% of negative control affinity purification/MS experiments in the CRAPome database<sup>102</sup>  
364 (FDR < 10%). Enrichment of proteins representing specific Gene Ontology terms was  
365 performed using PANTHER with GO-Slim Cellular Component and GO-Slim Biological Process  
366 terms<sup>103</sup>.

### 367 [Large scale co-IP/MS on HA-Gli2 \(P1-6A\) in ciliated and non-ciliated cells](#)

368 NIH/3T3 cells stably expressing HA-Gli2 (P1-6A) were transduced either with the control vector  
369 or with a retroviral vector encoding the dominant-negative variant of Kif3a (headless – amino  
370 acids 441-701 of the mouse Kif3a; dnKif3a) and selected with puromycin to eliminate  
371 untransduced cells. Each cell line was expanded from a single clone and ciliogenesis or lack  
372 thereof was verified by immunofluorescence.

373 Both cell lines were starved for 36h and lysed in a gentle lysis buffer (50mM Tris pH 7.4,  
374 150mM NaCl, 0.1% Nonidet P-40, 5% glycerol, protease and phosphatase inhibitors) and  
375 scraped at 4°C. The lysate was clarified for 30min at 15,000xg and the supernatant was  
376 immunoprecipitated for 2h at 4°C with Dynabeads-protein G covalently coupled to the rat  
377 anti-HA antibody (Roche). The beads were washed 3x5 min. with the lysis buffer and 1x5min  
378 with the lysis buffer with the addition of 350mM NaCl (total NaCl concentration 500mM).  
379 Protein was eluted from beads using 2x Laemmli sample buffer at 37°C for 30min with  
380 vigorous mixing (500rpm).

381 Eluted proteins were submitted for mass spectrometric protein identification to MS Bioworks  
382 (Ann Arbor, MI). The entire amount of sample was separated ~1.5cm on a 10% Bis-Tris Novex  
383 mini-gel (Invitrogen) using the MES buffer system. The gels were stained with coomassie and  
384 excised into ten equally sized segments. Gel segments were processed using a robot (ProGest,  
385 DigiLab) with the following protocol: Washed with 25mM ammonium bicarbonate followed  
386 by acetonitrile. Reduced with 10mM dithiothreitol at 60°C followed by alkylation with 50mM  
387 iodoacetamide at RT. Digested with trypsin (Promega) at 37°C for 4h. Quenched with formic  
388 acid and the supernatant was analyzed directly without further processing.

389 The gel digests were analyzed by nano LC/MS/MS with a Waters M-class HPLC system  
390 interfaced to a ThermoFisher Fusion Lumos. Peptides were loaded on a trapping column and  
391 eluted over a 75µm analytical column at 350nL/min; both columns were packed with Luna C18  
392 resin (Phenomenex). A 30min gradient was employed (5h LC/MS/MS per sample). The mass  
393 spectrometer was operated in data-dependent mode, with MS and MS/MS performed in the  
394 Orbitrap at 60,000 FWHM resolution and 15,000 FWHM resolution, respectively. APD was  
395 turned on. The instrument was run with a 3s cycle for MS and MS/MS. Data were searched  
396 using a local copy of Mascot with the following parameters: Enzyme: Trypsin, Database:  
397 Swissprot Mouse (concatenated forward and reverse plus common contaminants), Fixed  
398 modification: Carbamidomethyl (C), Variable modifications: Oxidation (M), Acetyl (Protein N-  
399 term), Deamidation (NQ), Mass values: Monoisotopic, Peptide Mass Tolerance: 10 ppm,  
400 Fragment Mass Tolerance: 0.02 Da, Max Missed Cleavages: 2. Mascot DAT files were parsed

401 into the Scaffold software for validation, filtering, and to create a nonredundant list per  
402 sample. Data were filtered at 1% protein and peptide level FDR and requiring at least two  
403 unique peptides per protein.

#### 404 [Viral transduction](#)

405 For lentivirus production, we transfected HEK293T cells with pRSV-rev, pMDLg/pRRE, pMD2.G  
406 lentiviral packaging vectors (addgene, Tab. 1) and the construct encoding our protein or  
407 shRNA or sgRNA of interest, and then after 2 days, we collected the virus-containing medium  
408 and added it to target cells. We used puromycin to select transduced cells.

#### 409 [siRNA mediated knockdown](#)

410 For siRNA-mediated knockdown of Sec5, we used the Sec5 ON-TARGET plus siRNA set of four  
411 siRNAs with non-targeting controls (Horizon Dharmacon). For siRNA transfection, we used  
412 Lipofectamine RNAiMAX (Thermofisher). Each siRNA was introduced at 40 pmol/well on a 24-  
413 well plate for 48h.

#### 414 [shRNA mediated knockdown](#)

415 shRNAs were cloned into pLKO.1-TRC cloning vector (Tab. 1). Targeting sequences were  
416 designed using the BlockIT software from the Thermo-Fisher website.

#### 417 [CRISPR-Cas9-mediated mutagenesis](#)

418 CRISPR-Cas9-mediated mutagenesis was performed on NIH/3T3 Flp-In cells stably expressing  
419 HA-Gli2(P1-6A) and Cas9 (Tab. 1). sgRNA sequences were designed using the Broad Institute  
420 sgRNA designer tool <sup>104</sup> and cloned into the pLentiGuide-puro vector (addgene, Tab. 1). We  
421 transduced the target cells with lentiviruses carrying the sgRNA of interest and either fixed  
422 72h later or subjected to antibiotic selection.

423 Tab. 2. Sequences used for shRNA knockdown, CRISPR edition, and qPCR primers.

| name                    | sequence              |
|-------------------------|-----------------------|
| <b>shRNA-Sec3</b>       | GGAGGTGGACCAGATTGAACT |
| <b>shRNA-Sec5</b>       | GCATACGGCCGAAGAGATAAA |
| <b>shRNA-Sec8</b>       | GCAGGAGCTAAAGCAGATTGT |
| <b>shRNA-Rab14</b>      | CGGTTACACGGAGCTACTATA |
| <b>shRNA-Rab18</b>      | TATCATGGCAGTGAGTATTTG |
| <b>shRNA-Arf4</b>       | CGGTTACACGGAGCTACTATA |
| <b>shRNA-Luciferase</b> | GCTGGAGAGCAACTGCATAAG |
| <b>sgRNA Rab23</b>      | AAAGACTACAAGAAAACCAT  |
| <b>sgRNA Rab14</b>      | CATATAACCACTTAAGCAGC  |
| <b>sgRNA Rab18</b>      | ATACTCATCATCGGCGAGAG  |
| <b>sgRNA Arf4</b>       | GATCGTGAAAGAATCCAGGA  |
| <b>qPCR Rab14 F</b>     | GGTTCAGAGCGGTTACACG   |
| <b>qPCR Rab14 R</b>     | TGAGATTCCTTGCGTCTGTC  |
| <b>qPCR Rab18 F</b>     | GCACGCAAGCATTCTATGTTG |
| <b>qPCR Rab18 R</b>     | AGCTTGACTCCTTTGTTCTGG |

|                    |                        |
|--------------------|------------------------|
| <b>qPCR Arf4 F</b> | AGGATCTGCCAAACGCTATG   |
| <b>qPCR Arf4 R</b> | CCTCATACAGACCAGTTCCTTG |
| <b>qPCR Sec3 F</b> | TCGCGCTGAGAAAAGATGAC   |
| <b>qPCR Sec3 R</b> | TTCTTGCCAGCTTTGCAGAC   |
| <b>qPCR Sec5 F</b> | CGGAGGTGCAAGTTTTCA AG  |
| <b>qPCR Sec5 R</b> | GCATGGAGGTGCGAAAGA TAC |
| <b>qPCR Sec8 F</b> | AATTGACCACAGCCATTCGC   |
| <b>qPCR Sec8 R</b> | TCATCCCGTTTGCAATGCAG   |

424

425 **Immunostaining and microscopy.**

426 Cells were cultured on glass coverslips. After low-serum starvation to promote ciliogenesis,  
 427 we fixed cells in 4% [w/v] paraformaldehyde in PBS for 15min at room temperature (RT) and  
 428 then washed 3 x 10min in phosphate buffer saline (PBS). Subsequently, cells were blocked and  
 429 permeabilized in 5% [w/v] donkey serum in 0.2% [w/v] Triton X-100 in PBS. We incubated cells  
 430 with the primary antibodies diluted in blocking buffer overnight at 4°C. Next, we washed the  
 431 coverslips 3 x 10min with 0.05% [w/v] Triton X-100 in PBS, followed by incubation with  
 432 secondary antibodies in the blocking buffer for 1 hour at RT. Cells were washed as above and  
 433 mounted onto slides using a fluorescent mounting medium with DAPI (ProLong Diamond,  
 434 Thermo). We acquired images on an inverted Olympus IX-73 fluorescent microscope equipped  
 435 with a 63x uPLANAPO oil objective and the Photometrics Evolve 512 Delta camera. For  
 436 superresolution microscopy, we used the Zeiss LSM800 confocal microscope with the Airyscan  
 437 detector and Plan Apochromat 63x/1.4 Oil DIC objective.

438 For the quantitative analysis of fluorescence intensities, images were acquired with the same  
 439 settings of exposure time, gain, offset, and illumination. Fluorescent intensities were  
 440 measured in a semi-supervised manner by a custom ImageJ script. To calculate the Gli ciliary  
 441 accumulation, we calculated the log<sub>10</sub> values of the ratios of intensities of the fluorescent  
 442 signal at the tip of the primary cilium and the surrounding background in each cell.

443 Tab. 3. Antibodies used for western blot, immunofluorescence staining, and proximity ligation  
 444 assay

| Antibody                     | Application                                | Company     | Ref No.     |
|------------------------------|--------------------------------------------|-------------|-------------|
| <b>Primary antibodies</b>    | Western blot (WB), Immunofluorescence (IF) |             |             |
| <b>anti-HA High Affinity</b> | WB (1:1000); IF (1:2000)                   | Roche       | 11867423001 |
| <b>anti-HA</b>               | WB (1:1000)                                | BioLegend   | 901501      |
| <b>anti-GFP</b>              | WB (1:1000)                                | Genetex     | GTX113617   |
| <b>anti-Arl13b</b>           | IF (1:2000)                                | Proteintech | 17711-1-AP  |
| <b>anti-Sec5</b>             | WB (1:500); IF (1:200);<br>PLA             | Proteintech | 12751-1-AP  |
| <b>anti-Sec5</b>             | WB (1:2000)                                | Proteintech | 66011-1-Ig  |
| <b>anti-Sec3</b>             | WB (1:1000); IF (1:500)                    | Proteintech | 11690-1-AP  |
| <b>anti-Sec8</b>             | WB (1:300)                                 | Proteintech | 11913-1-AP  |

|                                         |             |                                    |             |
|-----------------------------------------|-------------|------------------------------------|-------------|
| <b>anti-<math>\alpha</math>-tubulin</b> | WB (1:1000) | Sigma                              | T6199       |
| <b>anti-beta-actin</b>                  | WB (1:1000) | Sigma                              | A1978-100UL |
| <b>anti-Gli2</b>                        | WB (1:1000) | home-made by Davids biotechnologie |             |
| <b>anti-Gli2</b>                        | PLA         | R&D Systems                        | AF3635      |
| <b>anti-Gli3</b>                        | WB (1:1000) | R&D Systems                        | AF3690      |
| <b>anti-Pericentrin</b>                 | IF (1:200)  | BD Biosciences                     | 611814      |
| <b>anti-EEA1</b>                        | WB (1:1000) | BD Biosciences                     | 610456      |
| <b>anti-acetylated tubulin</b>          | IF (1:1000) | Sigma                              | T6793       |
| <b>Secondary antibodies</b>             |             |                                    |             |
| <b>anti-mouse alexa-488</b>             | IF (1:1000) | Jackson ImmunoResearch             | 715-545-151 |
| <b>anti-rabbit alexa-488</b>            | IF (1:1000) | Jackson ImmunoResearch             | 711-545-152 |
| <b>anti-rat alexa-488</b>               | IF (1:1000) | Jackson ImmunoResearch             | 712-545-153 |
| <b>anti-rabbit alexa-Cy3</b>            | IF (1:1000) | Jackson ImmunoResearch             | 711-165-152 |
| <b>anti-mouse alexa-594</b>             | IF (1:1000) | Jackson ImmunoResearch             | 715-585-151 |
| <b>anti-rabbit alexa-594</b>            | IF (1:1000) | Jackson ImmunoResearch             | 711-585-152 |
| <b>anti-rat alexa-647</b>               | IF (1:1000) | Jackson ImmunoResearch             | 712-605-153 |
| <b>HRP anti-mouse</b>                   | WB (1:2500) | BioLegend                          | 405306      |
| <b>HRP anti-rabbit</b>                  | WB (1:2500) | BioLegend                          | 406401      |
| <b>HRP anti-goat</b>                    | WB (1:2500) | Sigma                              | A5420       |

445

#### 446 [Co-immunoprecipitation](#)

447 We performed co-immunoprecipitation using Pierce Anti-HA Magnetic Beads (Life  
448 Technologies) or using Dynabeads-protein G (Thermo) magnetic beads with primary  
449 antibodies (anti-GFP Genetex No#GTX113717; anti-Sec5 Proteintech No#12751-1-AP) cross-  
450 linked using dimethyl pimelimidate (Life Technologies).

451 For the production of whole-cell lysates, cells were lysed in 4°C in lysis buffer (50 mM Tris at  
452 pH 7.4, 1% NP-40 [v/v], 150 mM NaCl, 0.25% sodium deoxycholate [v/v], protease inhibitor  
453 cocktail [1× EDTA-free protease inhibitors, Sigma], 10mM NaF). 1/10 part of the clarified lysate  
454 was saved as an input fraction, and the rest was subjected to immunoprecipitation.

455 After adding beads, binding of the protein of interest was performed overnight with gentle  
456 rotation at 4°C. The next day, beads were washed 4 x 10min in 4°C in the same lysis buffer to  
457 remove unbound proteins, and complexes were eluted off the beads using 2x SDS sample  
458 buffer at 37C for 30min. We analyzed the composition of eluent using the SDS-PAGE and  
459 Western Blot method.

#### 460 [SDS-PAGE and Western Blot](#)

461 Proteins were denaturated for 30min at 65°C and resolved by SDS-PAGE. Afterward, we  
462 performed electrotransfer onto a nitrocellulose membrane. Immunocomplexes were  
463 detected using an enhanced chemiluminescence detection system (Clarity or Clarity Max, Bio-  
464 rad) on Amersham Imager 680 and 800 as 16-bit grayscale TIFF files. The molecular weight of  
465 proteins was estimated with pre-stained protein markers (Bio-rad).

466 [Proximity Ligation Assay](#)

467 We performed the proximity ligation assay<sup>105</sup> using the Duolink PLA Kit (Merck) according to  
468 the manufacturer's protocol. Anti-Sec5 and anti-Gli2 primary antibodies (Tab. 3) were used to  
469 detect sites of interaction between the proteins in NIH/3T3 Flp-In cells.

470 [Endosome Isolation](#)

471 The Trident Endosome Isolation Kit (Genetex) was used to fractionate cell lysates according to  
472 the manufacturer's protocol.

473 [Electron Microscopy](#)

474 HEK293 cells expressing EGFP-Gli2(P-16A) were fixed on the dish with 4% PFA in 0.2M  
475 phosphate buffer and 0.25% sucrose. The samples were sent to Biocenter Oulu Electron  
476 Microscopy Core Facility and there processed for EM and immunogold labeled with anti-GFP.  
477 Imaging was performed on Sigma HD VP FE-SEM equipped with ET-SE and In-lens SE detectors,  
478 VPSE G3 detector for low vacuum mode, and 5Q-BSD detector.

479 [Data analysis](#)

480 The statistical data analysis was performed using Microsoft Excel and R/RStudio. For the  
481 processing of the fluorescence images, we used the Fiji/ImageJ suite. Statistical significance  
482 was calculated using Student's t-test for experiments involving two experimental groups, or  
483 ANOVA and Tukey posthoc test for multiple comparisons.



## 484 References

- 485 1. Briscoe, J. & Théron, P. P. The mechanisms of Hedgehog signalling and its roles in  
486 development and disease. *Nat. Rev. Mol. Cell Biol.* **14**, 416–429 (2013).
- 487 2. Niewiadomski, P. *et al.* Gli Proteins: Regulation in Development and Cancer. *Cells* **8**,  
488 (2019).
- 489 3. Huangfu, D. *et al.* Hedgehog signalling in the mouse requires intraflagellar transport  
490 proteins. *Nature* **426**, 83–87 (2003).
- 491 4. Goetz, S. C. & Anderson, K. V. The primary cilium: a signalling centre during vertebrate  
492 development. *Nat. Rev. Genet.* **11**, 331–344 (2010).
- 493 5. Zeng, H., Jia, J. & Liu, A. Coordinated translocation of mammalian Gli proteins and  
494 suppressor of fused to the primary cilium. *PLoS One* **5**, e15900 (2010).
- 495 6. Tukachinsky, H., Lopez, L. V. & Salic, A. A mechanism for vertebrate Hedgehog signaling:  
496 recruitment to cilia and dissociation of SuFu–Gli protein complexes. *J. Cell Biol.* **191**,  
497 415–428 (2010).
- 498 7. Niewiadomski, P., Zhujiang, A., Youssef, M. & Waschek, J. A. Interaction of PACAP with  
499 Sonic hedgehog reveals complex regulation of the hedgehog pathway by PKA. *Cell.*  
500 *Signal.* **25**, 2222–2230 (2013).
- 501 8. Barzi, M., Berenguer, J., Menendez, A., Alvarez-Rodriguez, R. & Pons, S. Sonic-  
502 hedgehog-mediated proliferation requires the localization of PKA to the cilium base. *J.*  
503 *Cell Sci.* **123**, 62–69 (2010).
- 504 9. Santos, N. & Reiter, J. F. A central region of Gli2 regulates its localization to the primary  
505 cilium and transcriptional activity. *J. Cell Sci.* **127**, 1500–1510 (2014).
- 506 10. Haycraft, C. J. *et al.* Gli2 and Gli3 Localize to Cilia and Require the Intraflagellar  
507 Transport Protein Polaris for Processing and Function. *PLoS Genet.* **1**, e53 (2005).
- 508 11. Han, Y. *et al.* Regulation of Gli ciliary localization and Hedgehog signaling by the PY-  
509 NLS/karyopherin- $\beta$ 2 nuclear import system. *PLoS Biol.* **15**, e2002063 (2017).
- 510 12. Lin, Y.-C. *et al.* Chemically inducible diffusion trap at cilia reveals molecular sieve-like  
511 barrier. *Nat. Chem. Biol.* **9**, 437–443 (2013).
- 512 13. Nachury, M. V., Seeley, E. S. & Jin, H. Trafficking to the ciliary membrane: how to get  
513 across the periciliary diffusion barrier? *Annu. Rev. Cell Dev. Biol.* **26**, 59–87 (2010).
- 514 14. Cassioli, C. & Baldari, C. T. A Ciliary View of the Immunological Synapse. *Cells* **8**, (2019).
- 515 15. Milenkovic, L., Scott, M. P. & Rohatgi, R. Lateral transport of Smoothed from the  
516 plasma membrane to the membrane of the cilium. *J. Cell Biol.* **187**, 365–374 (2009).
- 517 16. Monis, W. J., Faundez, V. & Pazour, G. J. BLOC-1 is required for selective membrane  
518 protein trafficking from endosomes to primary cilia. *J. Cell Biol.* **216**, 2131–2150 (2017).
- 519 17. Lu, L. & Madugula, V. Mechanisms of ciliary targeting: entering importins and Rabs.  
520 *Cell. Mol. Life Sci. CMLS* **75**, 597–606 (2018).
- 521 18. Nassari, S., Del Olmo, T. & Jean, S. Rabs in Signaling and Embryonic Development. *Int. J.*  
522 *Mol. Sci.* **21**, (2020).
- 523 19. Takai, Y., Sasaki, T. & Matozaki, T. Small GTP-Binding Proteins. *Physiol. Rev.* **81**, 153–208  
524 (2001).

- 525 20. Yoshimura, S.-I., Egerer, J., Fuchs, E., Haas, A. K. & Barr, F. A. Functional dissection of  
526 Rab GTPases involved in primary cilium formation. *J. Cell Biol.* **178**, 363–369 (2007).
- 527 21. Kawamura, N. *et al.* Delivery of endosomes to lysosomes via microautophagy in the  
528 visceral endoderm of mouse embryos. *Nat. Commun.* **3**, 1–10 (2012).
- 529 22. Singh, S. K., Gui, M., Koh, F., Yip, M. C. & Brown, A. Structure and activation mechanism  
530 of the BBSome membrane protein trafficking complex. *eLife* **9**, e53322.
- 531 23. Wingfield, J. L., Lechtreck, K.-F. & Lorentzen, E. Trafficking of ciliary membrane proteins  
532 by the intraflagellar transport/BBSome machinery. *Essays Biochem.* **62**, 753–763  
533 (2018).
- 534 24. Lobo, G. P. *et al.* The exocyst is required for photoreceptor ciliogenesis and retinal  
535 development. *J. Biol. Chem.* **292**, 14814–14826 (2017).
- 536 25. Martin-Urdiroz, M., Deeks, M. J., Horton, C. G., Dawe, H. R. & Jourdain, I. The Exocyst  
537 Complex in Health and Disease. *Front. Cell Dev. Biol.* **4**, 24 (2016).
- 538 26. Mei, K. *et al.* Cryo-EM structure of the exocyst complex. *Nat. Struct. Mol. Biol.* **25**, 139–  
539 146 (2018).
- 540 27. Fogelgren, B. *et al.* The exocyst protein Sec10 interacts with Polycystin-2 and  
541 knockdown causes PKD-phenotypes. *PLoS Genet.* **7**, e1001361 (2011).
- 542 28. Zuo, X., Guo, W. & Lipschutz, J. H. The exocyst protein Sec10 is necessary for primary  
543 ciliogenesis and cystogenesis in vitro. *Mol. Biol. Cell* **20**, 2522–2529 (2009).
- 544 29. Chen, J. K., Taipale, J., Young, K. E., Maiti, T. & Beachy, P. A. Small molecule modulation  
545 of Smoothed activity. *Proc. Natl. Acad. Sci.* **99**, 14071–14076 (2002).
- 546 30. Mellacheruvu, D. *et al.* The CRAPome: a contaminant repository for affinity purification-  
547 mass spectrometry data. *Nat. Methods* **10**, 730–736 (2013).
- 548 31. Breslow, D. K. *et al.* A CRISPR-based screen for Hedgehog signaling provides insights  
549 into ciliary function and ciliopathies. *Nat. Genet.* **50**, 460–471 (2018).
- 550 32. Han, Y., Shi, Q. & Jiang, J. Multisite interaction with Sufu regulates Ci/Gli activity  
551 through distinct mechanisms in Hh signal transduction. *Proc. Natl. Acad. Sci. U. S. A.*  
552 **112**, 6383–6388 (2015).
- 553 33. Markiewicz, Ł., Uśpieński, T., Baran, B., Niedziółka, S. M. & Niewiadomski, P. Xpo7  
554 negatively regulates Hedgehog signaling by exporting Gli2 from the nucleus. *Cell.*  
555 *Signal.* **80**, 109907 (2021).
- 556 34. Maurya, A. K. *et al.* Positive and negative regulation of Gli activity by Kif7 in the  
557 zebrafish embryo. *PLoS Genet.* **9**, e1003955 (2013).
- 558 35. Ahmed, S. M. *et al.* Exocyst dynamics during vesicle tethering and fusion. *Nat. Commun.*  
559 **9**, 1–17 (2018).
- 560 36. Niewiadomski, P. *et al.* Gli protein activity is controlled by multisite phosphorylation in  
561 vertebrate Hedgehog signaling. *Cell Rep.* **6**, 168–181 (2014).
- 562 37. Huang, P. *et al.* Structural Basis of Smoothed Activation in Hedgehog Signaling. *Cell*  
563 **175**, 295–297 (2018).
- 564 38. Rohatgi, R., Milenkovic, L. & Scott, M. P. Patched1 regulates hedgehog signaling at the  
565 primary cilium. *Science* **317**, 372–376 (2007).

- 566 39. Luo, G., Zhang, J. & Guo, W. The role of Sec3p in secretory vesicle targeting and exocyst  
567 complex assembly. *Mol. Biol. Cell* **25**, 3813–3822 (2014).
- 568 40. Sung, C.-H. & Leroux, M. R. The roles of evolutionarily conserved functional modules in  
569 cilia-related trafficking. *Nat. Cell Biol.* **15**, 1387–1397 (2013).
- 570 41. Lee, S.-H. *et al.* Export of membrane proteins from the Golgi complex to the primary  
571 cilium requires the kinesin motor, KIFC1. *FASEB J. Off. Publ. Fed. Am. Soc. Exp. Biol.* **32**,  
572 957–968 (2018).
- 573 42. Leroux, M. R. Taking vesicular transport to the cilium. *Cell* **129**, 1041–1043 (2007).
- 574 43. Goldenring, J. R. Recycling endosomes. *Curr. Opin. Cell Biol.* **35**, 117–122 (2015).
- 575 44. Naslavsky, N. & Caplan, S. Endocytic membrane trafficking in the control of centrosome  
576 function. *Curr. Opin. Cell Biol.* **65**, 150–155 (2020).
- 577 45. Macia, E. *et al.* Dynasore, a cell-permeable inhibitor of dynamin. *Dev. Cell* **10**, 839–850  
578 (2006).
- 579 46. Dutta, D., Williamson, C. D., Cole, N. B. & Donaldson, J. G. Pitstop 2 is a potent inhibitor  
580 of clathrin-independent endocytosis. *PLoS One* **7**, e45799 (2012).
- 581 47. Miller, S. G., Carnell, L. & Moore, H. H. Post-Golgi membrane traffic: brefeldin A inhibits  
582 export from distal Golgi compartments to the cell surface but not recycling. *J. Cell Biol.*  
583 **118**, 267–283 (1992).
- 584 48. Kim, J., Kato, M. & Beachy, P. A. Gli2 trafficking links Hedgehog-dependent activation of  
585 Smoothed in the primary cilium to transcriptional activation in the nucleus. *Proc.*  
586 *Natl. Acad. Sci.* **106**, 21666–21671 (2009).
- 587 49. Stenmark, H. Rab GTPases as coordinators of vesicle traffic. *Nat. Rev. Mol. Cell Biol.* **10**,  
588 513–525 (2009).
- 589 50. Lin, F. *et al.* Kidney-specific inactivation of the KIF3A subunit of kinesin-II inhibits renal  
590 ciliogenesis and produces polycystic kidney disease. *Proc. Natl. Acad. Sci. U. S. A.* **100**,  
591 5286–5291 (2003).
- 592 51. Markiewicz, Ł., Uśpieński, T., Niedziółka, S. M. & Niewiadomski, P. Xpo7 negatively  
593 regulates Hedgehog signaling by exporting Gli2 from the nucleus. *bioRxiv*  
594 2020.01.31.928408 (2020) doi:10.1101/2020.01.31.928408.
- 595 52. Umberger, P. A. & Ogden, S. K. SPOP and CUL3 Modulate the Sonic Hedgehog Signal  
596 Response Through Controlled Degradation of GLI Family Transcription Factors. *Front.*  
597 *Cell Dev. Biol.* **9**, 710295 (2021).
- 598 53. Eggenschwiler, J. T., Bulgakov, O. V., Qin, J., Li, T. & Anderson, K. V. Mouse Rab23  
599 regulates hedgehog signaling from smoothed to Gli proteins. *Dev. Biol.* **290**, 1–12  
600 (2006).
- 601 54. Hor, C., Lo, J., Cham, A., Leong, W. Y. & Goh, E. Multifaceted functions of Rab23 on  
602 primary cilium- and Hedgehog signaling-mediated cerebellar granule cell proliferation.  
603 *J. Neurosci. Off. J. Soc. Neurosci.* JN-RM-3005-20 (2021) doi:10.1523/JNEUROSCI.3005-  
604 20.2021.
- 605 55. Wang, Y., Ng, E. L. & Tang, B. L. Rab23: what exactly does it traffic? *Traffic Cph. Den.* **7**,  
606 746–750 (2006).

- 607 56. Das, A. & Guo, W. Rabs and the exocyst in ciliogenesis, tubulogenesis and beyond.  
608 *Trends Cell Biol.* **21**, 383–386 (2011).
- 609 57. Feng, S. *et al.* A Rab8 guanine nucleotide exchange factor-effector interaction network  
610 regulates primary ciliogenesis. *J. Biol. Chem.* **287**, 15602–15609 (2012).
- 611 58. Lee, K. H. *et al.* Identification of a novel Wnt5a-CK1 $\epsilon$ -Dvl2-Plk1-mediated primary cilia  
612 disassembly pathway. *EMBO J.* **31**, 3104–3117 (2012).
- 613 59. Morris, R. L. *et al.* Redistribution of the kinesin-II subunit KAP from cilia to nuclei during  
614 the mitotic and ciliogenic cycles in sea urchin embryos. *Dev. Biol.* **274**, 56–69 (2004).
- 615 60. Viau, A. *et al.* Cilia-localized LKB1 regulates chemokine signaling, macrophage  
616 recruitment, and tissue homeostasis in the kidney. *EMBO J.* **37**, (2018).
- 617 61. Clement, D. L. *et al.* PDGFR $\alpha$  signaling in the primary cilium regulates NHE1-dependent  
618 fibroblast migration via coordinated differential activity of MEK1/2-ERK1/2-p90RSK and  
619 AKT signaling pathways. *J. Cell Sci.* **126**, 953–965 (2013).
- 620 62. Peixoto, E. *et al.* HDAC6-dependent ciliophagy is involved in ciliary loss and  
621 cholangiocarcinoma growth in human cells and murine models. *Am. J. Physiol.*  
622 *Gastrointest. Liver Physiol.* **318**, G1022–G1033 (2020).
- 623 63. Lai, Y. & Jiang, Y. Reciprocal Regulation between Primary Cilia and mTORC1. *Genes* **11**,  
624 E711 (2020).
- 625 64. Emechebe, U. *et al.* T-box3 is a ciliary protein and regulates stability of the Gli3  
626 transcription factor to control digit number. *eLife* **5**, e07897 (2016).
- 627 65. Raman, M. *et al.* Systematic VCP-UBXD Adaptor Network Proteomics Identifies a Role  
628 for UBXN10 in Regulating Ciliogenesis. *Nat. Cell Biol.* **17**, 1356–1369 (2015).
- 629 66. Picco, A. *et al.* The In Vivo Architecture of the Exocyst Provides Structural Basis for  
630 Exocytosis. *Cell* **168**, 400–412.e18 (2017).
- 631 67. Wood, C. R. & Rosenbaum, J. L. Proteins of the ciliary axoneme are found on  
632 cytoplasmic membrane vesicles during growth of cilia. *Curr. Biol. CB* **24**, 1114–1120  
633 (2014).
- 634 68. Nachury, M. V. & Mick, D. U. Establishing and regulating the composition of cilia for  
635 signal transduction. *Nat. Rev. Mol. Cell Biol.* **20**, 389–405 (2019).
- 636 69. Pedersen, L. B., Veland, I. R., Schrøder, J. M. & Christensen, S. T. Assembly of primary  
637 cilia. *Dev. Dyn. Off. Publ. Am. Assoc. Anat.* **237**, 1993–2006 (2008).
- 638 70. Reed, S. E. *et al.* A role for Rab14 in the endocytic trafficking of GLUT4 in 3T3-L1  
639 adipocytes. *J. Cell Sci.* **126**, 1931–1941 (2013).
- 640 71. Proikas-Cezanne, T., Gaugel, A., Frickey, T. & Nordheim, A. Rab14 is part of the early  
641 endosomal clathrin-coated TGN microdomain. *FEBS Lett.* **580**, 5241–5246 (2006).
- 642 72. Junutula, J. R. *et al.* Rab14 Is Involved in Membrane Trafficking between the Golgi  
643 Complex and Endosomes. *Mol. Biol. Cell* **15**, 2218–2229 (2004).
- 644 73. Ueno, H., Huang, X., Tanaka, Y. & Hirokawa, N. KIF16B/Rab14 Molecular Motor  
645 Complex Is Critical for Early Embryonic Development by Transporting FGF Receptor.  
646 *Dev. Cell* **20**, 60–71 (2011).

- 647 74. Lu, R. & Wilson, J. M. Rab14 specifies the apical membrane through Arf6-mediated  
648 regulation of lipid domains and Cdc42. *Sci. Rep.* **6**, (2016).
- 649 75. Dejgaard, S. Y. *et al.* Rab18 and Rab43 have key roles in ER-Golgi trafficking. *J. Cell Sci.*  
650 **121**, 2768–2781 (2008).
- 651 76. Martin, S. & Parton, R. G. Characterization of Rab18, a lipid droplet-associated small  
652 GTPase. *Methods Enzymol.* **438**, 109–129 (2008).
- 653 77. Li, C. *et al.* COPI-TRAPP II activates Rab18 and regulates its lipid droplet association.  
654 *EMBO J.* **36**, 441–457 (2017).
- 655 78. Loukil, A., Barrington, C. & Goetz, S. C. A complex of distal appendage-associated  
656 kinases linked to human disease regulates ciliary trafficking and stability. *Proc. Natl.*  
657 *Acad. Sci.* **118**, (2021).
- 658 79. Leaf, A. & Von Zastrow, M. Dopamine receptors reveal an essential role of IFT-B, KIF17,  
659 and Rab23 in delivering specific receptors to primary cilia. *eLife* **4**, e06996 (2015).
- 660 80. Boehlke, C. *et al.* Differential role of Rab proteins in ciliary trafficking: Rab23 regulates  
661 smoothed levels. *J. Cell Sci.* **123**, 1460–1467 (2010).
- 662 81. Lim, Y. S. & Tang, B. L. A role for Rab23 in the trafficking of Kif17 to the primary cilium.  
663 *J. Cell Sci.* **128**, 2996–3008 (2015).
- 664 82. Evans, T. M., Ferguson, C., Wainwright, B. J., Parton, R. G. & Wicking, C. Rab23, a  
665 negative regulator of hedgehog signaling, localizes to the plasma membrane and the  
666 endocytic pathway. *Traffic Cph. Den.* **4**, 869–884 (2003).
- 667 83. Follit, J. A. *et al.* Arf4 is required for Mammalian development but dispensable for  
668 ciliary assembly. *PLoS Genet.* **10**, e1004170 (2014).
- 669 84. Gillingham, A. K. & Munro, S. The small G proteins of the Arf family and their regulators.  
670 *Annu. Rev. Cell Dev. Biol.* **23**, 579–611 (2007).
- 671 85. Deretic, D., Lorentzen, E. & Fresquez, T. The ins and outs of the Arf4-based ciliary  
672 membrane-targeting complex. *Small GTPases* 1–12 (2019)  
673 doi:10.1080/21541248.2019.1616355.
- 674 86. Oguchi, M. E., Okuyama, K., Homma, Y. & Fukuda, M. A comprehensive analysis of Rab  
675 GTPases reveals a role for Rab34 in serum starvation-induced primary ciliogenesis. *J.*  
676 *Biol. Chem.* **295**, 12674–12685 (2020).
- 677 87. Westlake, C. J. *et al.* Primary cilia membrane assembly is initiated by Rab11 and  
678 transport protein particle II (TRAPP II) complex-dependent trafficking of Rabin8 to the  
679 centrosome. *Proc. Natl. Acad. Sci.* **108**, 2759–2764 (2011).
- 680 88. Grozdanov, P. N. & MacDonald, C. C. Generation of plasmid vectors expressing FLAG-  
681 tagged proteins under the regulation of human elongation factor-1 $\alpha$  promoter using  
682 Gibson assembly. *J. Vis. Exp. JoVE* (2015) doi:10.3791/52235.
- 683 89. Martin, T. D. *et al.* Ral and Rheb GTPase activating proteins integrate mTOR and GTPase  
684 signaling in aging, autophagy, and tumor cell invasion. *Mol. Cell* **53**, 209–220 (2014).
- 685 90. Bindels, D. S. *et al.* mScarlet: a bright monomeric red fluorescent protein for cellular  
686 imaging. *Nat. Methods* **14**, 53–56 (2017).

- 687 91. Moffat, J. *et al.* A lentiviral RNAi library for human and mouse genes applied to an  
688 arrayed viral high-content screen. *Cell* **124**, 1283–1298 (2006).
- 689 92. Bryant, D. M. *et al.* A molecular network for de novo generation of the apical surface  
690 and lumen. *Nat. Cell Biol.* **12**, 1035–1045 (2010).
- 691 93. Sanjana, N. E., Shalem, O. & Zhang, F. Improved vectors and genome-wide libraries for  
692 CRISPR screening. *Nat. Methods* **11**, 783–784 (2014).
- 693 94. Fellmann, C. *et al.* An optimized microRNA backbone for effective single-copy RNAi. *Cell*  
694 *Rep.* **5**, 1704–1713 (2013).
- 695 95. Dull, T. *et al.* A third-generation lentivirus vector with a conditional packaging system. *J.*  
696 *Virology* **72**, 8463–8471 (1998).
- 697 96. Huang, B. *et al.* The *Anaplasma phagocytophilum*-occupied vacuole selectively recruits  
698 Rab-GTPases that are predominantly associated with recycling endosomes. *Cell.*  
699 *Microbiol.* **12**, 1292–1307 (2010).
- 700 97. Chun, J., Shapovalova, Z., Dejgaard, S. Y., Presley, J. F. & Melançon, P. Characterization  
701 of class I and II ADP-ribosylation factors (Arfs) in live cells: GDP-bound class II Arfs  
702 associate with the ER-Golgi intermediate compartment independently of GBF1. *Mol.*  
703 *Biol. Cell* **19**, 3488–3500 (2008).
- 704 98. Nakai, W. *et al.* ARF1 and ARF4 regulate recycling endosomal morphology and  
705 retrograde transport from endosomes to the Golgi apparatus. *Mol. Biol. Cell* **24**, 2570–  
706 2581 (2013).
- 707 99. Choudhury, A. *et al.* Rab proteins mediate Golgi transport of caveola-internalized  
708 glycosphingolipids and correct lipid trafficking in Niemann-Pick C cells. *J. Clin. Invest.*  
709 **109**, 1541–1550 (2002).
- 710 100. Nachury, M. V. *et al.* A core complex of BBS proteins cooperates with the GTPase Rab8  
711 to promote ciliary membrane biogenesis. *Cell* **129**, 1201–1213 (2007).
- 712 101. Humke, E. W., Dorn, K. V., Milenkovic, L., Scott, M. P. & Rohatgi, R. The output of  
713 Hedgehog signaling is controlled by the dynamic association between Suppressor of  
714 Fused and the Gli proteins. *Genes Dev.* **24**, 670–682 (2010).
- 715 102. Mellacheruvu, D. *et al.* The CRAPome: a contaminant repository for affinity purification-  
716 mass spectrometry data. *Nat. Methods* **10**, 730–736 (2013).
- 717 103. Mi, H. *et al.* PANTHER version 16: a revised family classification, tree-based  
718 classification tool, enhancer regions and extensive API. *Nucleic Acids Res.* **49**, D394–  
719 D403 (2021).
- 720 104. Doench, J. G. *et al.* Optimized sgRNA design to maximize activity and minimize off-  
721 target effects of CRISPR-Cas9. *Nat. Biotechnol.* **34**, 184–191 (2016).
- 722 105. Söderberg, O. *et al.* Direct observation of individual endogenous protein complexes in  
723 situ by proximity ligation. *Nat. Methods* **3**, 995–1000 (2006).
- 724 106. Szklarczyk, D. *et al.* STRING v11: protein-protein association networks with increased  
725 coverage, supporting functional discovery in genome-wide experimental datasets.  
726 *Nucleic Acids Res.* **47**, D607–D613 (2019).

727 107. Goodsell, D. S., Autin, L. & Olson, A. J. Illustrate: Software for Biomolecular Illustration.  
728 *Structure* **27**, 1716-1720.e1 (2019).  
729  
730

A

**Gli3-interacting proteins**

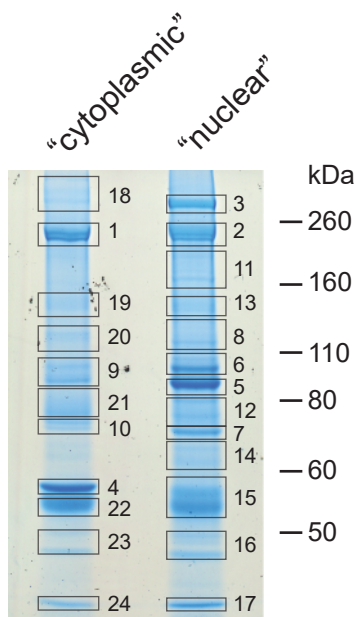

B

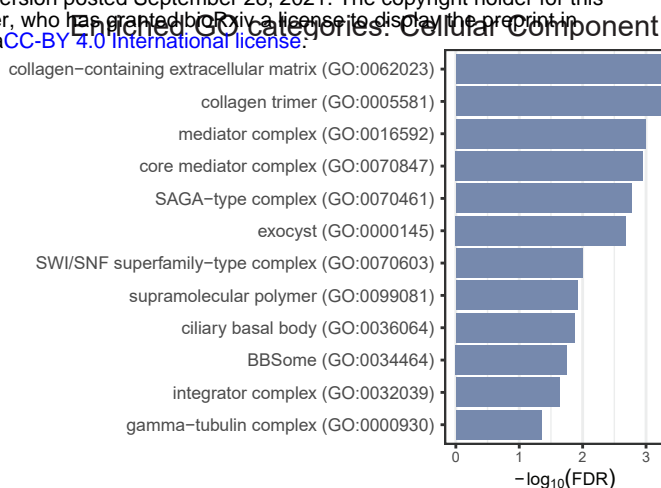

C

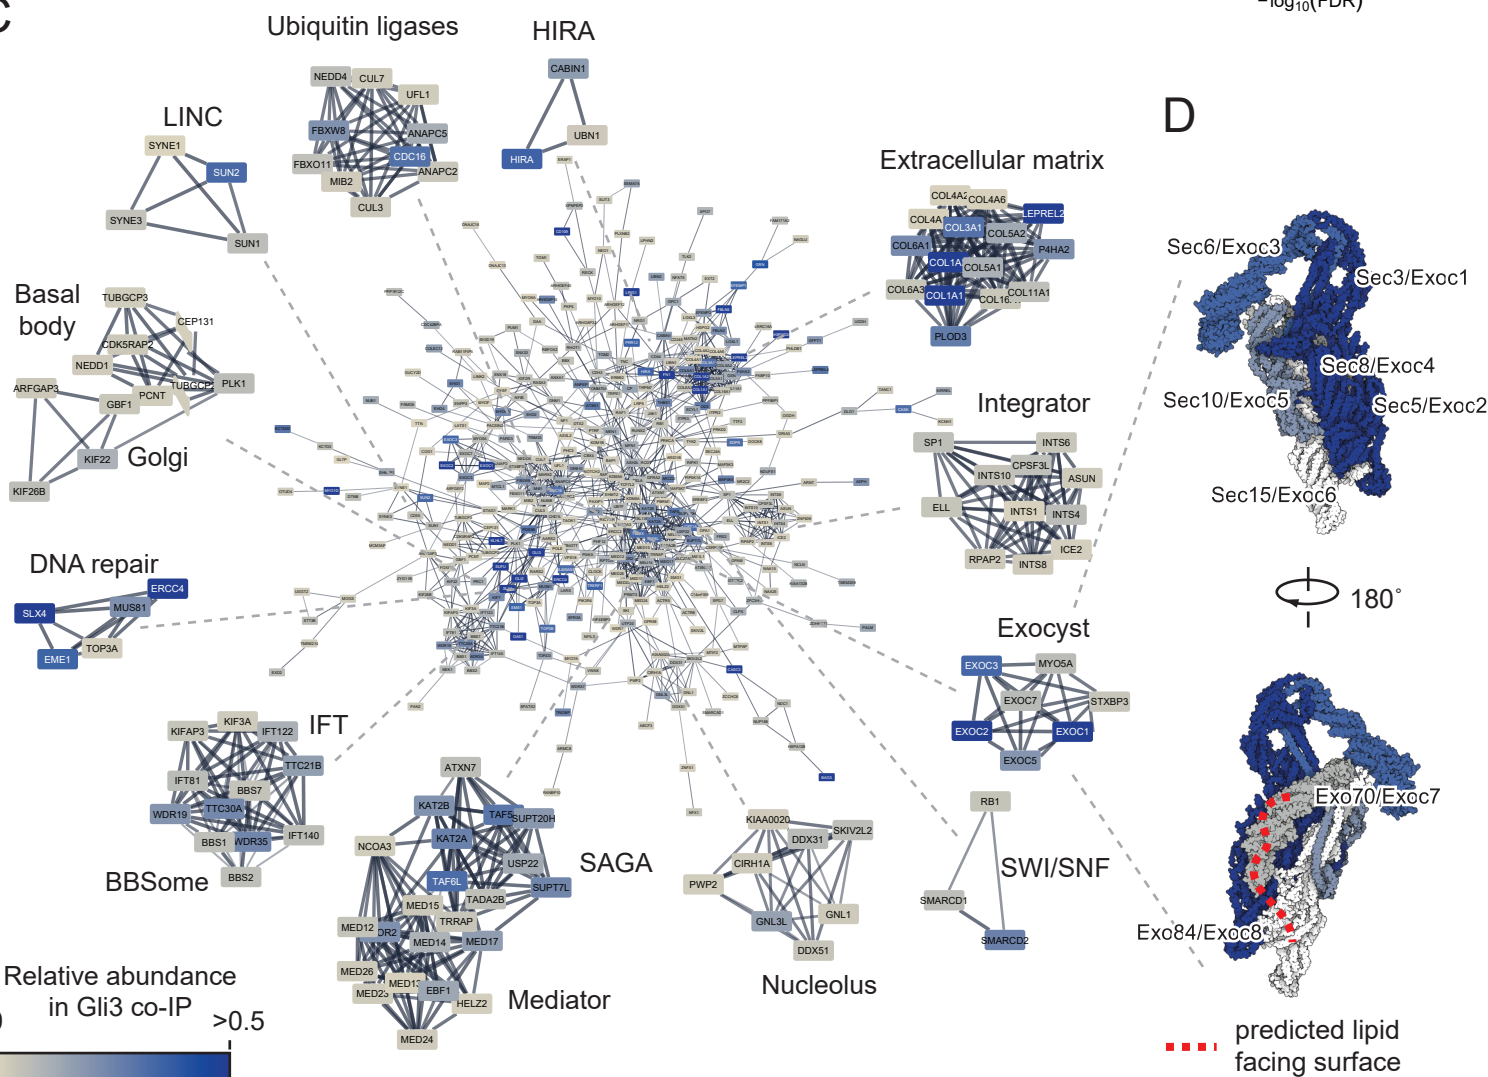

D

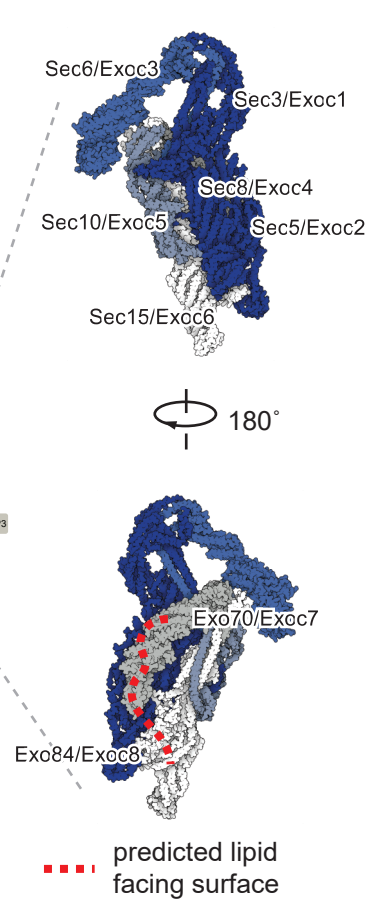



### Fig. 1 Gli3 interactome is enriched for proteins involved in ciliary transport of vesicles

(A) NIH/3T3 Flp-In cells were treated with 100nM SAG for 4h, roughly fractionated into a “cytoplasmic” and “nuclear” fraction, and each fraction was pulled down using magnetic beads coated with the anti-Gli3 antibody. Proteins were resolved on SDS-PAGE, the gel was stained with coomassie brilliant blue and prominent bands were excised for mass spectrometry-based protein ID. Shown is the image of the coomassie-stained gel with each of the excised bands indicated and numbered. Gli3 is enriched in bands 1 (“cytoplasmic”) and 2 (“nuclear”). (B) MS-identified proteins from all bands were pooled and common MS-AP contaminants (>10% FDR from the CRAPome database 30) were removed. PANTHER 103 was used to find overrepresented Gene Ontology (GO) terms in the “PANTHER GO – Slim Biological Process” and “PANTHER GO – Slim Cellular Component” categories. Top-level enriched GO terms are shown with their corresponding  $-\log_{10}(\text{FDR})$  values. (C) High confidence Gli3 interactors identified by MS were connected into a network using the STRING 106 plugin in Cytoscape. Shown is the main protein network with the node color representing the approximate relative abundance of the protein in the Gli3 interactome and the edge thickness corresponding to the confidence of connection between proteins in the STRING database. Also shown are highly interconnected sub-networks identified using MCODE clustering, which typically corresponds to protein complexes or multiprotein functional units. (D) The exocyst complex structure (PDB ID: 5yfp ref 26) was rendered using Illustrate 107 with each subunit colored according to its abundance in Gli3 IP/MS as in C. Subunits not identified in our experiment are rendered in white. The red dashed line corresponds to the predicted surface of the exocyst complex that comes into contact with the plasma membrane lipids 26. Each subunit is labeled with its alternative gene names.

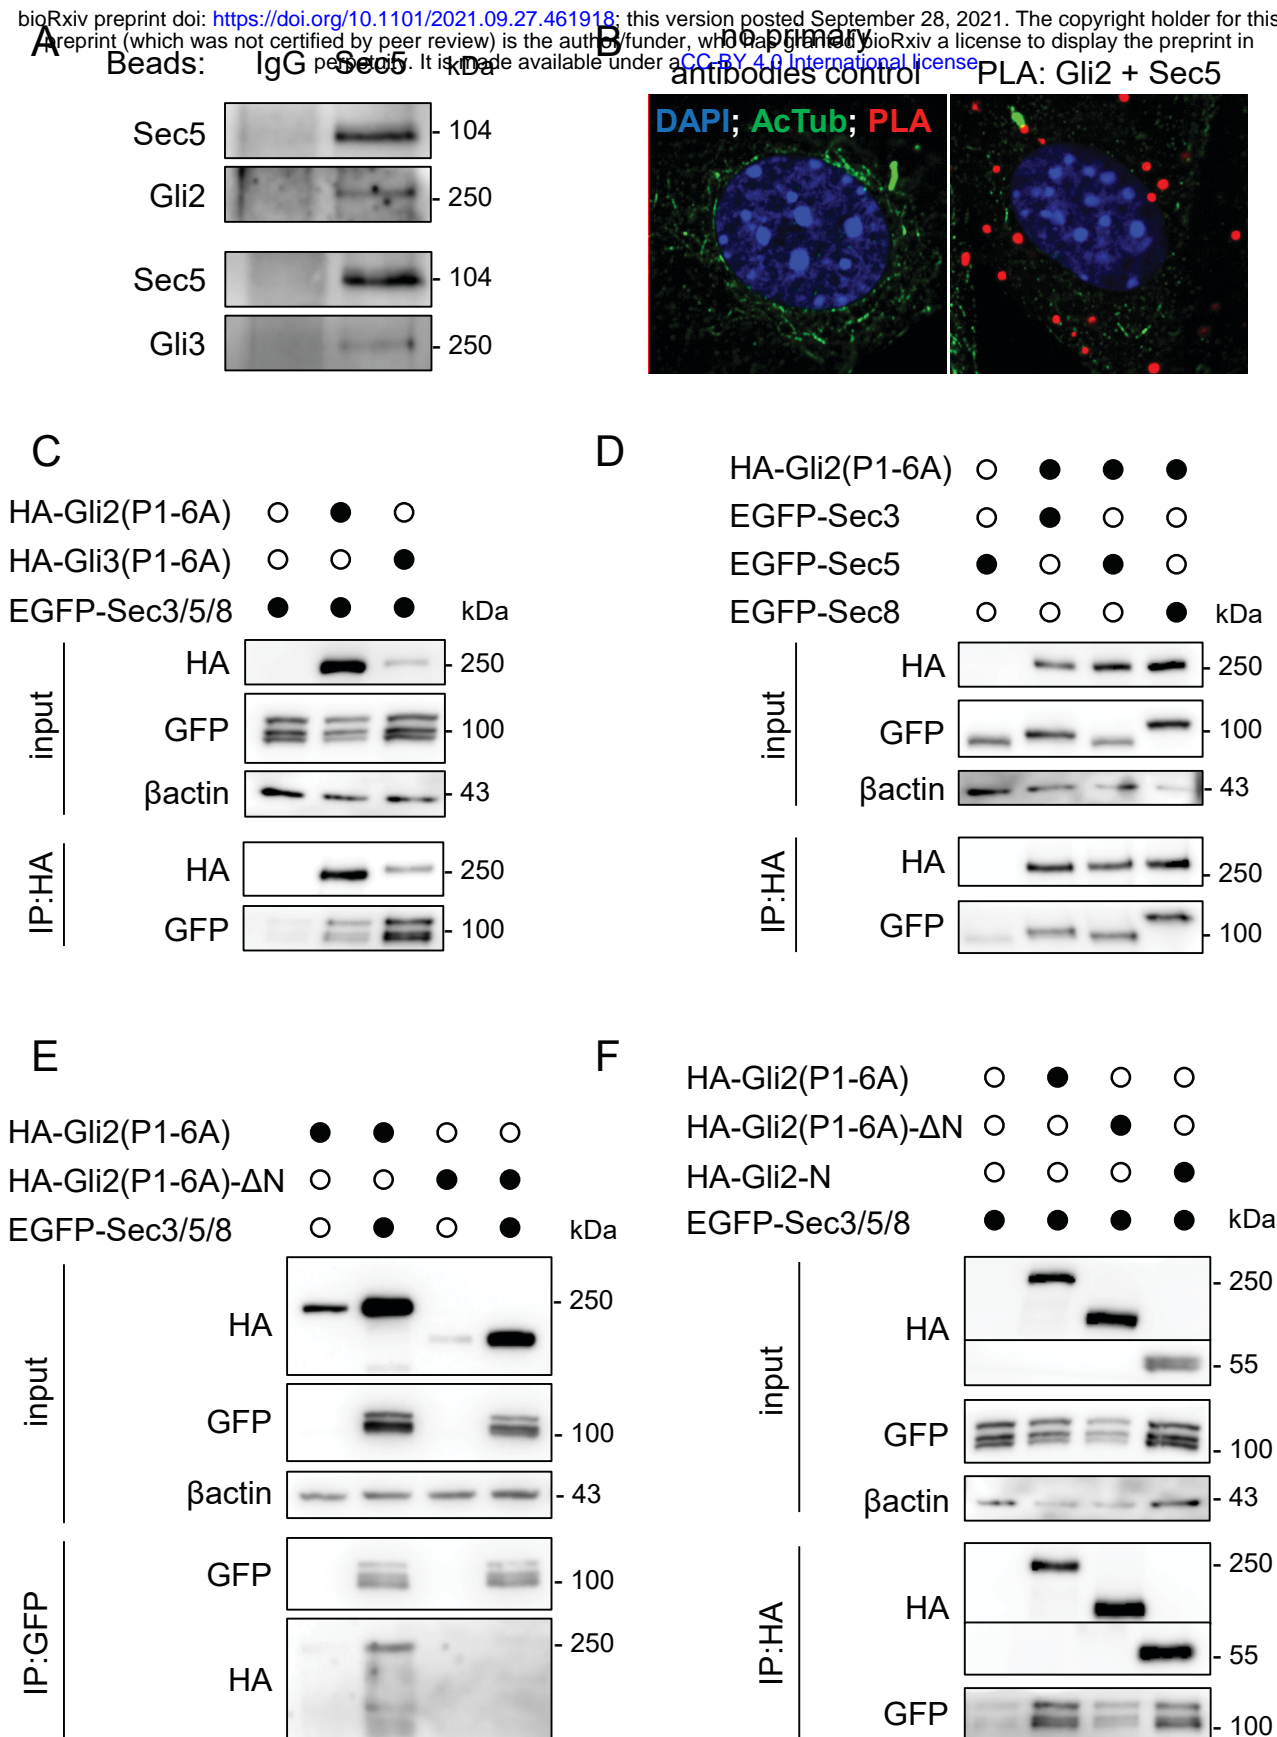

**Fig. 2 Exocyst subunits interact with Gli2 and Gli3**

(A) Co-immunoprecipitation of endogenous Sec5 with Gli2 and Gli3. Beads were coated with anti-Sec5 antibodies. Rabbit IgG was used as a control. (B) Proximity Ligation Assay with anti-Gli2 and anti-Sec5 antibodies in NIH/3T3 mouse fibroblasts. Sites of interaction are marked in red. Cilia were stained with anti-acetylated tubulin (green), and nuclei with DAPI (blue) (C) Co-immunoprecipitation of overexpressed HA-Gli2(P1-6A) and HA-Gli3(P1-6A) with the exocyst subunits Sec3, Sec5, and Sec8 tagged with EGFP in HEK293T cells using anti-HA beads (D) Co-immunoprecipitation of overexpressed HA-Gli2(P1-6A) with single exocyst subunits Sec3, Sec5 and Sec8 tagged with EGFP in HEK293T cells using anti-HA beads (E) Reciprocal co-immunoprecipitation of overexpressed EGFP-tagged Sec3, Sec5 and Sec8 with HA-Gli2(P1-6A) constructs using anti-GFP beads. (F) Co-immunoprecipitation of overexpressed HA-Gli2(P1-6A) truncation constructs with the exocyst subunits Sec3, Sec5, and Sec8 tagged with EGFP in HEK293T cells using anti-HA beads.

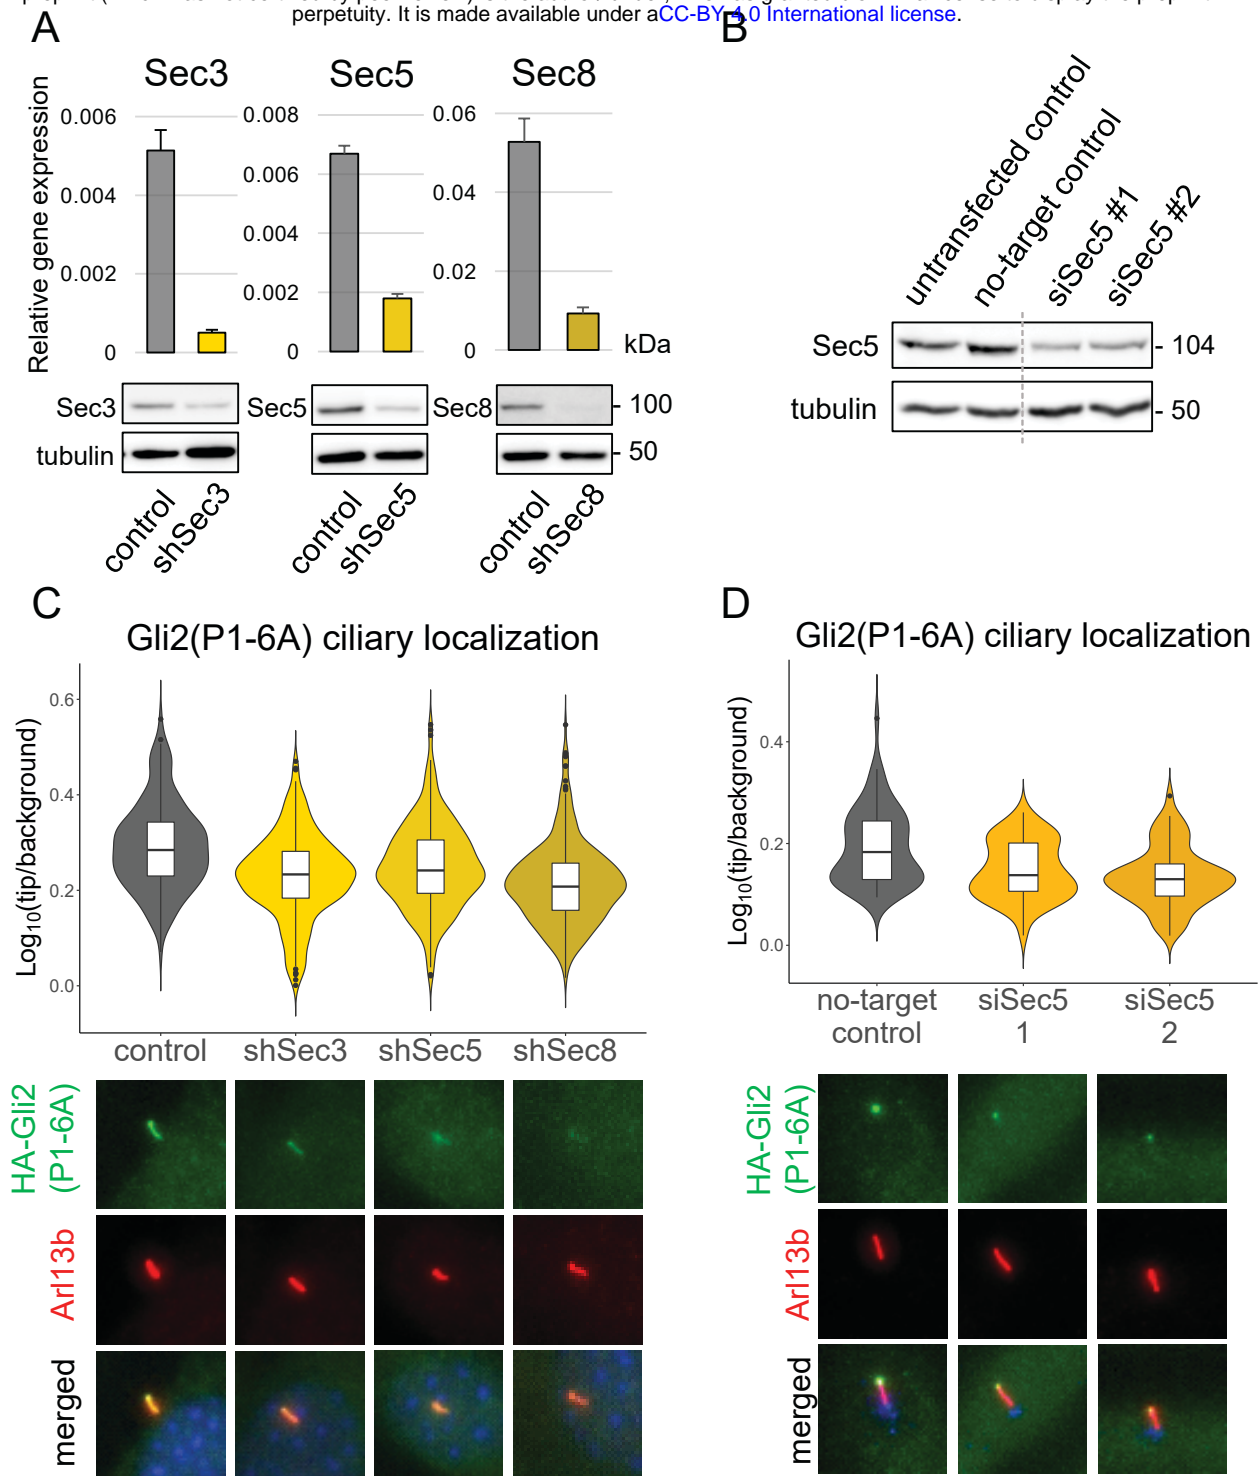

**Fig. 3 Knockdown of exocyst subunits decreases Gli2 ciliary localization**

(A) mRNA expression levels of the indicated genes in cells stable expressing Gli2(P1-6A) and transduced with shRNA against each of the genes were measured using qRT-PCR. Control cells were transduced with shRNA against luciferase. The protein level of the indicated proteins was detected by western blot. (B) The protein level of Sec5 in cells transfected with siRNA against Sec5 or non-targeting control siRNA. (C) Relative localization at the cilium tip of stably expressed Gli2(P1-6A) in cells with shRNA knockdown of Sec3, Sec5, and Sec8. Results are presented as violin plots of log-transformed ratios of fluorescence intensity of anti-HA staining at cilia tips to the intensity in the surrounding background. Cilia per variant  $n > 170$ . Student's t-test analysis control-shSec3 p-value =  $5.399e-12$ ; control-shSec5 p-value =  $2.206e-06$ ; control-shSec8 p-value  $< 2.2e-16$ . Representative images of Gli2(P1-6A) ciliary localization for each condition are presented below. Arl13b was used as a ciliary marker. (D) Relative localization at the cilium tip of Gli2(P1-6A) in cells transfected with indicated siRNAs. Fluorescence intensities were quantified as in Fig. 3C from  $n > 60$  cilia per group. Student's t-test for no-target control-siRNA2 p-value =  $0.0001015$ ; for no-target control-siRNA3 p-value =  $1.581e-06$ . Representative images of Gli2(P1-6A) ciliary localization for each condition are presented below. Arl13b was used as a ciliary marker and pericentrin (blue) as a basal body marker.

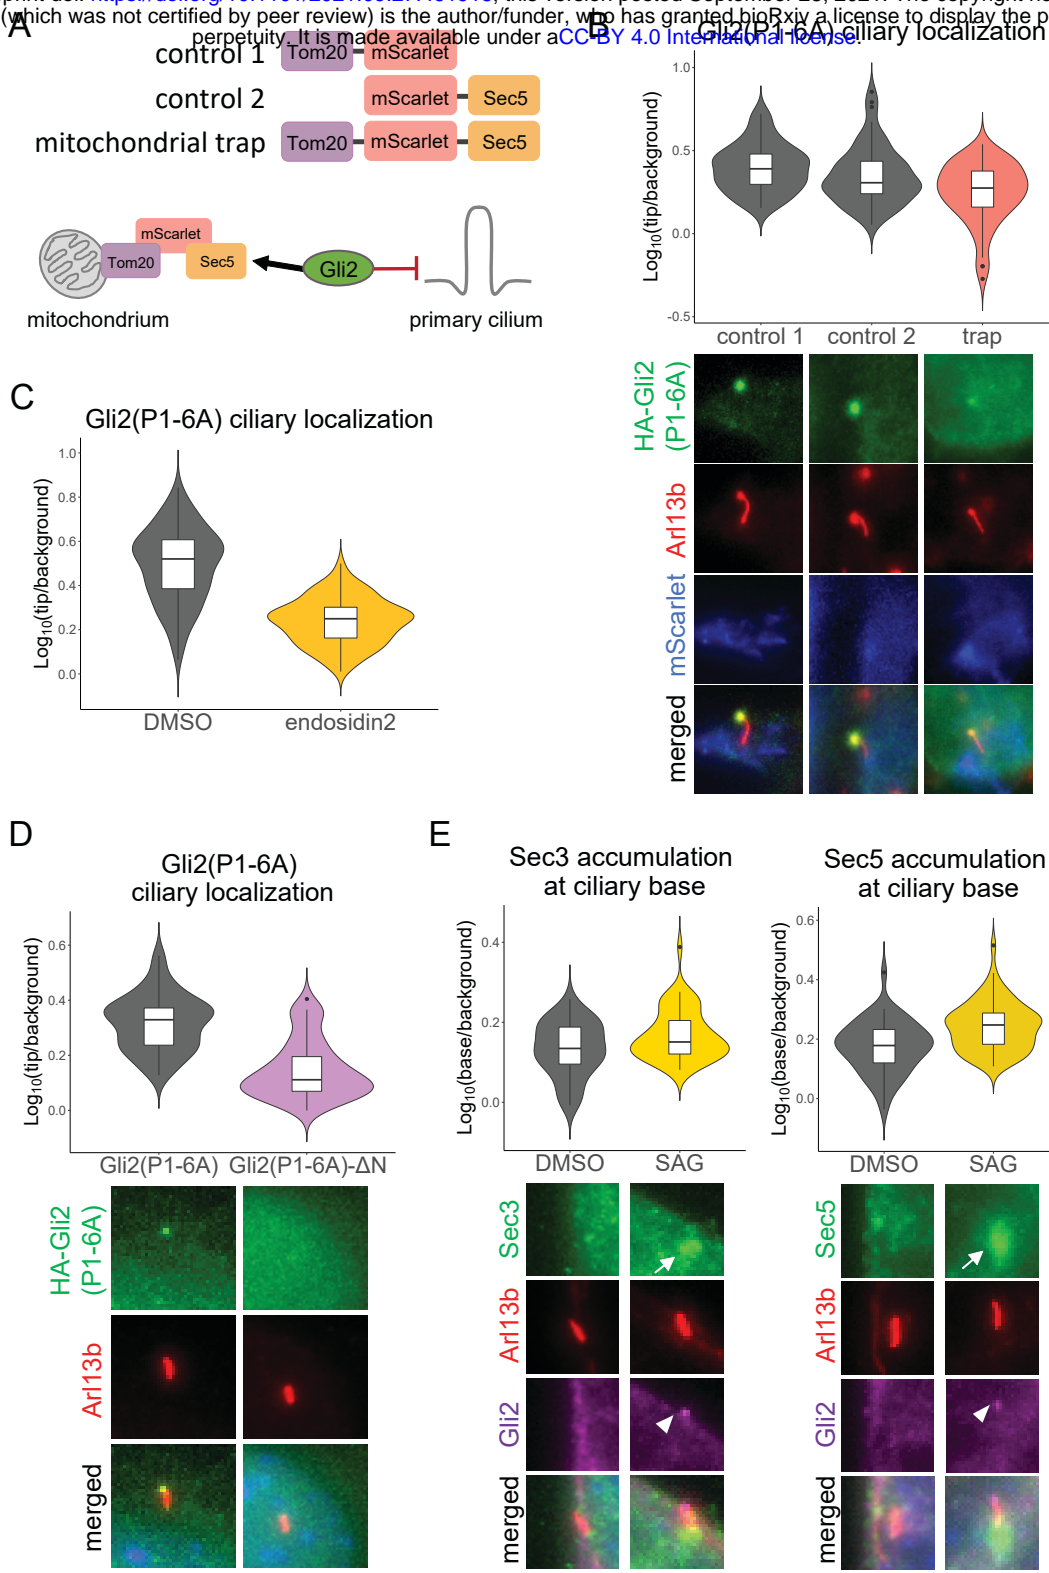

**Fig. 4 Impairment of exocyst function reduces Gli2 ciliary localization**

(A) Schematic representation of the exocyst mitochondrial trap constructs (top) and assay (bottom) (B) Relative localization at the cilium tip of Gli2(P1-6A) in HEK293T cells co-transfected with the HA-Gli2(P1-6A) and the indicated constructs in  $n > 40$  cilia. Fluorescence intensities were quantified as in Fig. 3C. Student's test for control 1 vs trap p-value =  $4.28e-06$ ; control 2 vs. trap p-value =  $0.002$ . Representative images of Gli2(P1-6A) ciliary localization are presented below. (C) The exocyst inhibitor endosidin2 blocks the ciliary accumulation of Gli2(P1-6A). Relative localization at the cilium tip of Gli2(P1-6A) in NIH/3T3 cells expressing HA-Gli2(P1-6A) treated for 2h with DMSO or  $200\mu\text{M}$  endosidin2 was measured in  $n > 100$  cilia per group. Fluorescence intensities were quantified as in Fig. 3C. Student's t-test p-value  $< 2.2e-16$  (D) Gli2(P1-6A)- $\Delta\text{N}$  is largely excluded from the tip of cilia. Relative localization at the cilium tip of Gli2 constructs stably expressed in NIH/3T3 cells. Fluorescence intensities were quantified as in Fig. 3C in  $n > 50$  cilia per group. Student's t-test p-value =  $2.2e-14$ . Representative images are presented below. Arl13b was used as a ciliary marker. (E) Effect of Smoothed agonist (SAG) treatment (24h;  $200\text{nM}$ ) on the accumulation of Sec3 and Sec5 at the ciliary base in NIH/3T3 cells. Cells were stained with anti-Sec3 or anti-Sec5 and the ciliary marker acetylated  $\alpha$ -tubulin (AcTub). Relative localization at the cilium base was measured in  $n > 40$  cells per group as in Fig. 3C. Student's t-test Sec3: control vs SAG p-value =  $0.005$ ; Sec5: control vs SAG p-value =  $4.6e-05$ . Representative images for each condition are presented below. Arl13b was used as a ciliary marker. White arrows show Sec3/5 accumulation and white arrowheads show Gli2 ciliary accumulation.

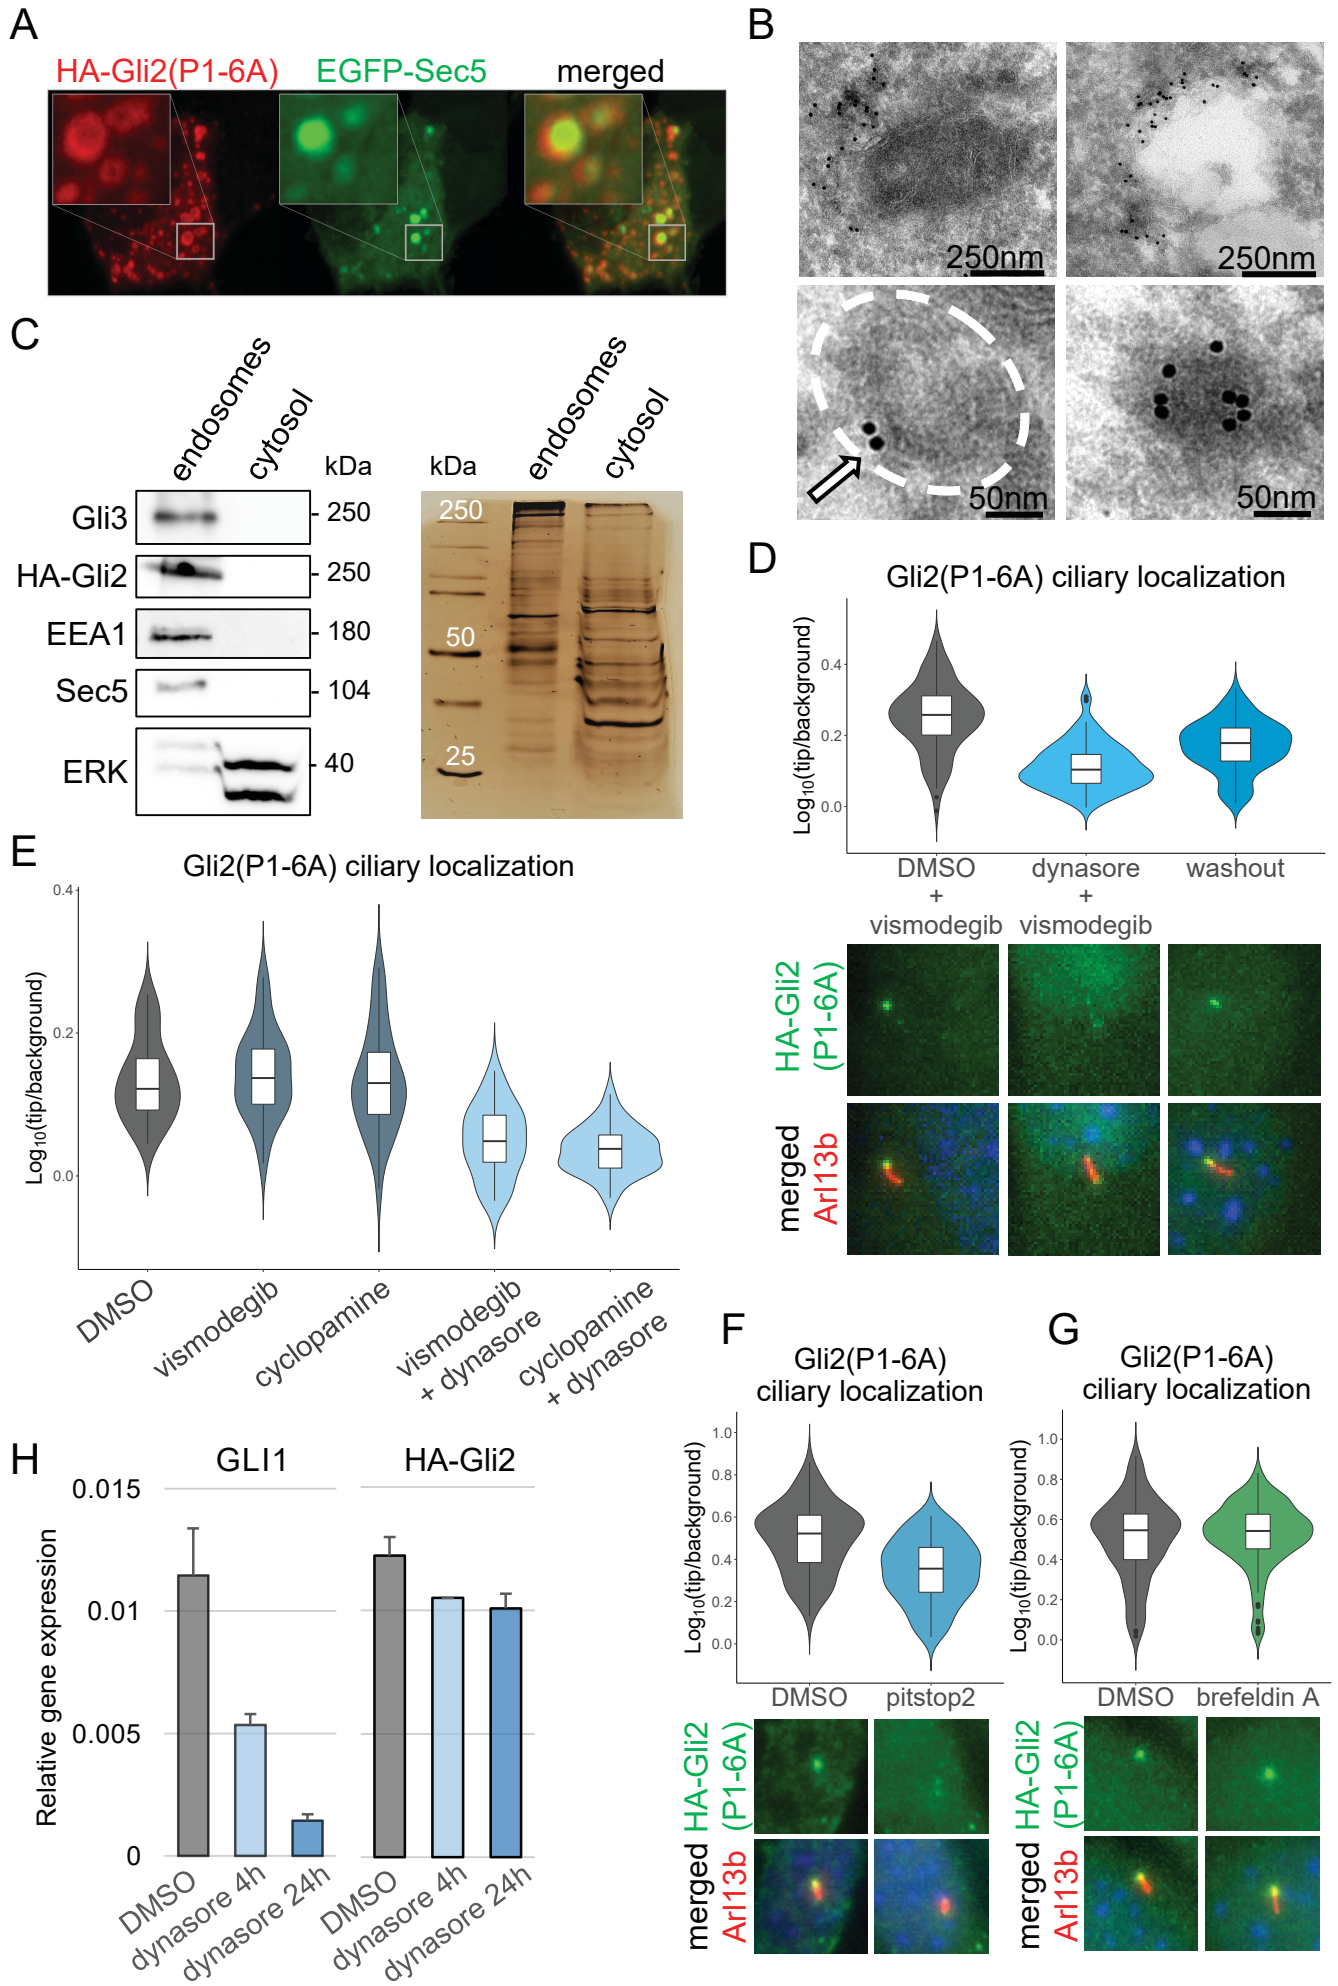

### Fig. 5 Gli2 associates with intracellular vesicles

(A) Airyscan fluorescence imaging of HEK293T cells co-transfected with HA-Gli2(P1-6A) and EGFP-Sec5 stained with anti-HA. Insets show high magnification of the Sec5- and HA-Gli2(P1-6A)-positive vesicle-like structures with Gli2 at the periphery (B) Electron microscopy images of HEK293T cells transfected with EGFP-Gli2(P1-6A) and labeled with immunogold-conjugated anti-GFP. EGFP-positive signal accumulates around vesicle-like structures (C) Cells stably expressing HA-Gli2(P1-6A) were fractionated using the endosome isolation kit and the fractions were resolved using SDS-PAGE. Immunoblot shows HA-Gli2(P1-6A), Gli3, and Sec5 in the endosomal fraction. EEA1 was used as a marker of the endosomes, and ERK was used as a cytosolic fraction marker. The same protein samples were resolved by SDS-PAGE and the gel was silver-stained, showing similar total protein abundance in both fractions. (D) Dynasore impairs Gli2(P1-6A) ciliary localization. Cells were treated with vismodegib in the presence or absence of dynasore for 2h hours and then the drugs were washed out for the indicated times. Relative localization of Gli2(P1-6A) at the cilium tip was measured as in Fig. 3C for  $n > 80$  cilia per group. Student's t-test DMSO+vismodegib vs dynasore+vismodegib  $p$ -value  $< 2.2e-16$ ; dynasore+vismodegib vs washout 1h  $p$ -value =  $4.25e-05$ ; dynasore+vismodegib vs washout 4h  $p$ -value =  $6.412e-10$ . Representative images of Gli2(P1-6A) ciliary localization for each condition are presented below. Arl13b was used as a ciliary marker. (E) Effect of dynasore treatment on Gli2(P1-6A) ciliary accumulation. NIH/3T3 cells with stable expression of HA-Gli2(P1-6A) were treated with dynasore (4h;  $40\mu\text{M}$ ) in the presence of Smo inhibitors vismodegib (4h;  $3\mu\text{M}$ ) and cyclopamine (4h;  $10\mu\text{M}$ ). The Smo inhibitors were used to ensure that the effect of dynasore was not due to its influence on Smo or Ptch trafficking. The Smo inhibitors did not influence Gli2(P1-6A) ciliary accumulation, as expected, and did not prevent dynasore from inhibiting Gli2(P1-6A) localization at the cilium tip. Relative localization of Gli2(P1-6A) at the cilium tip was measured as in Fig. 3C for  $n > 30$  cilia per group. Student's t-test DMSO vs vismodegib  $p$ -value =  $0.5533$ ; DMSO vs vismodegib+dynasore  $p$ -value =  $9.047e-08$ ; DMSO vs cyclopamine  $p$ -value =  $0.8634$ ; DMSO vs cyclopamine+dynasore  $p$ -value =  $1.708e-10$ . (F) Effect of pitstop2 treatment on Gli2(P1-6A) ciliary accumulation. Pitstop2 ( $30\mu\text{M}$ ) was used for 10min and then wash out to avoid its toxicity effect on cell viability. Effect of treatment was observed 30min after washout. Relative localization of Gli2(P1-6A) at the cilium tip was measured as in Fig. 3C for  $n > 80$  cilia per group. Student's t-test DMSO vs pitstop2 30min washout  $p$ -value =  $2.486e-10$ . Representative images of Gli2(P1-6A) ciliary localization for each condition are presented below. Arl13b was used as a ciliary marker. (G) Effect of brefeldin A treatment on Gli2(P1-6A) ciliary accumulation. Cells were treated with DMSO or brefeldin A ( $5\mu\text{g/ml}$ ) for 2h. Relative localization of Gli2(P1-6A) at the cilium tip was measured as in Fig. 3C for  $n > 140$  cilia per group. Student's t-test DMSO vs brefeldin A  $p$ -value =  $0.4565$ . Representative images of Gli2(P1-6A) ciliary localization for each condition are presented below. Arl13b was used as a ciliary marker. (H) The relative mRNA expression level of Gli1 (Hh pathway activity marker), and HA-Gli2(P1-6A) after 4h and 24h of dynasore treatment.

A

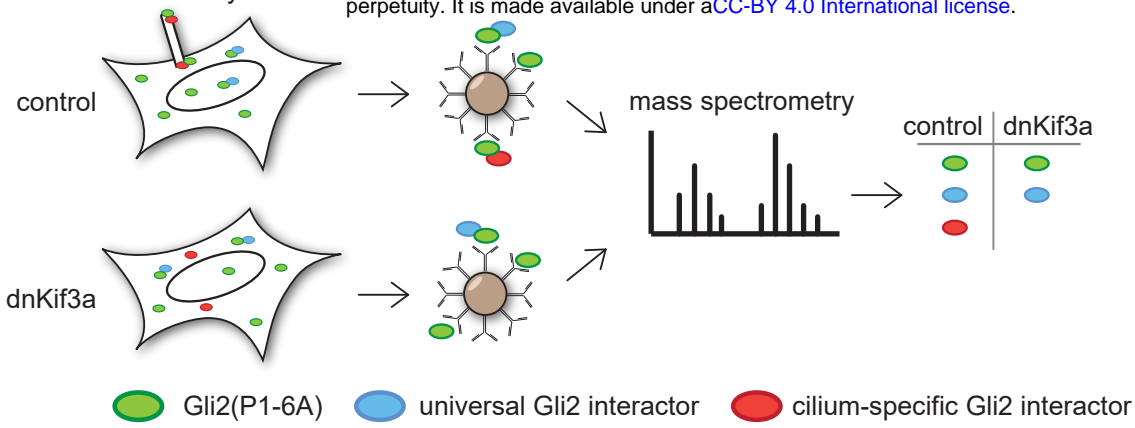

B

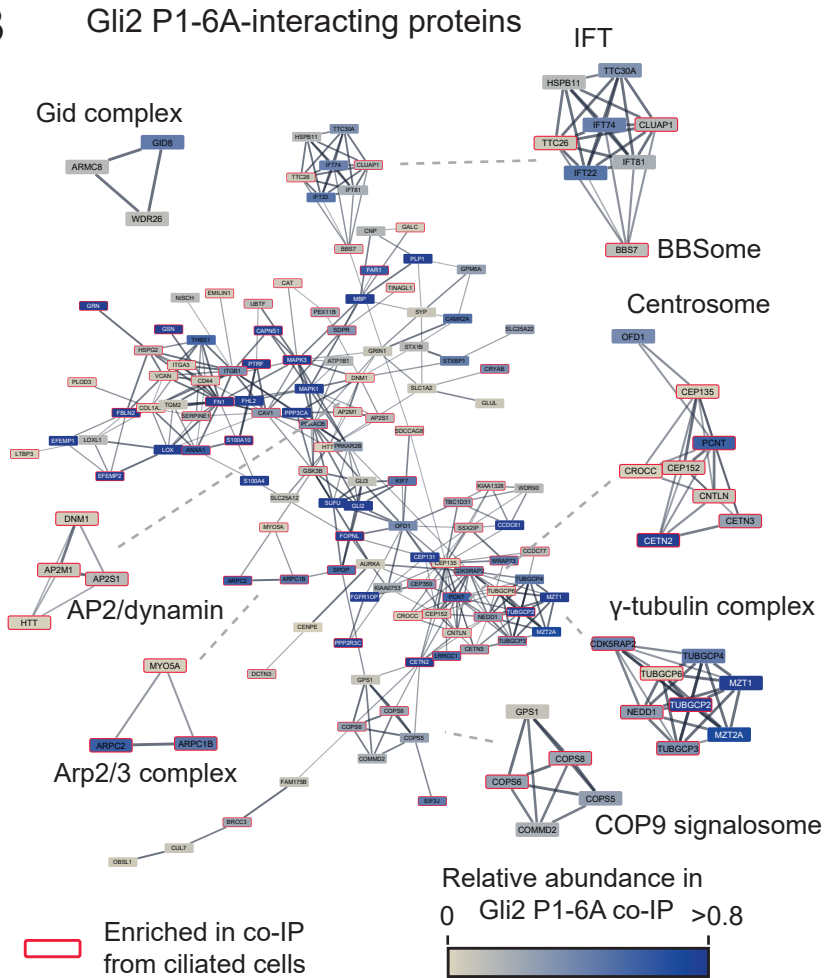

C

| Protein | Total enrichment in Gli2 co-IP | Relative co-IP enrichment in ciliated cells | FDR |
|---------|--------------------------------|---------------------------------------------|-----|
| Arf3    | 2.00                           | 40%                                         | 36% |
| Arf4    | 0.95                           | 74%                                         | 28% |
| Rab11b  | 0.21                           | 100%                                        | 17% |
| Rab14   | 0.33                           | 100%                                        | 21% |
| Rab18   | 0.35                           | 75%                                         | 12% |
| Rab3d   | 0.25                           | 50%                                         | 18% |
| Rab5c   | 0.26                           | 100%                                        | 21% |

**Fig. 6 Interaction network of Gli2(P1-6A) in ciliated and non-ciliated cells**

(A) Schematic representation of the experiment. NIH/3T3 Flp-In cells stably expressing HA-Gli2(P1-6A) and either vector control or H-dominant-negative Kif3a (dnKif3a) were lysed in gentle lysis buffer and the lysates were immunoprecipitated using magnetic beads coated with anti-HA antibodies. Eluted proteins were submitted for mass spectrometric analysis. Common MS-AP contaminants (>10% FDR from the CRAPome database 30) were removed from each dataset (control – ciliated, dnKif3a – non-ciliated) (B) High confidence HA-Gli2(P1-6A) interactors identified by MS were connected into a network using the STRING 106 plugin in Cytoscape. Proteins identified in Gli2(P1-6A) from ciliated and non-ciliated cells were pooled. Shown is the main protein network with the node color representing the approximate relative abundance of the protein in the Gli2 interactome and the edge thickness corresponding to the confidence of connection between proteins in the STRING database. Also shown are highly interconnected sub-networks identified using MCODE clustering, which typically corresponds to protein complexes or multiprotein functional units. Proteins that were identified predominantly in the ciliated cells are marked with red borders (C) Small GTPases identified in Gli2(P1-6A) co-IP/MS experiments are shown, with their relative enrichment scores, relative enrichment in ciliated vs non-ciliated cell co-IP samples, and FDR scores based on the CRAPome database.

**A**

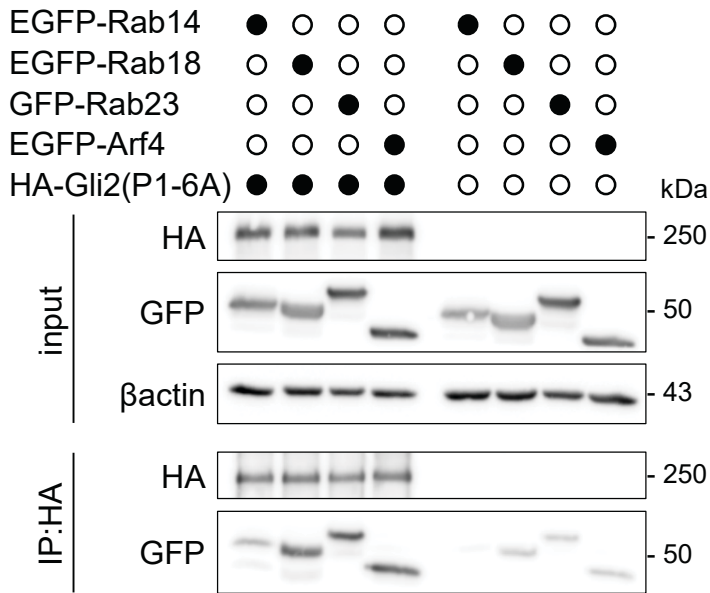

**B**

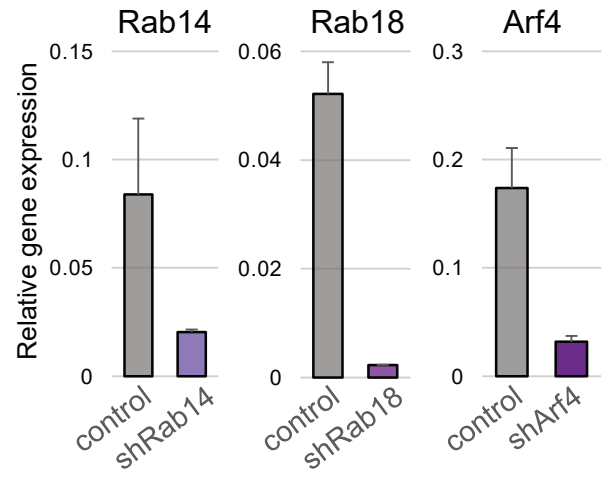

**C**

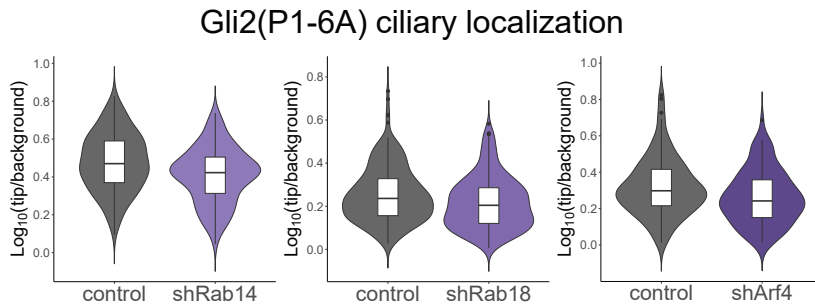

**D**

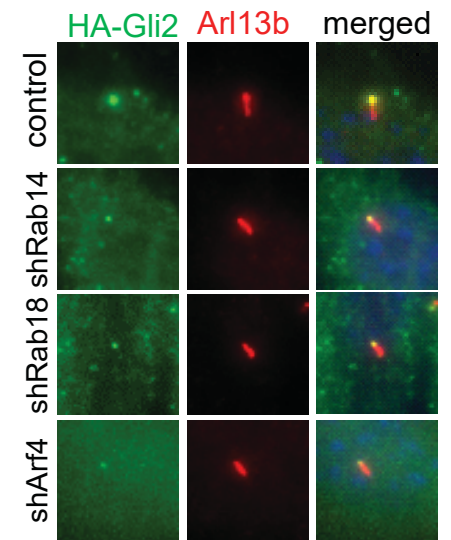

**E**

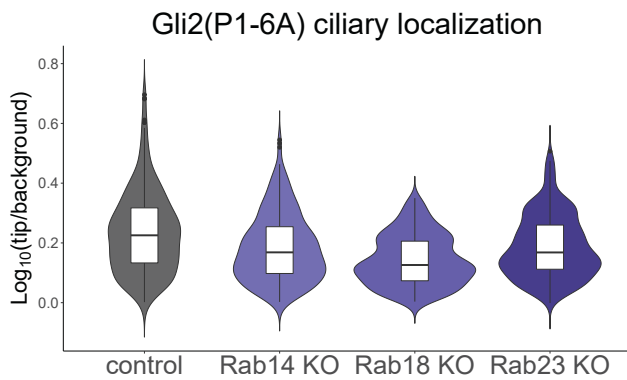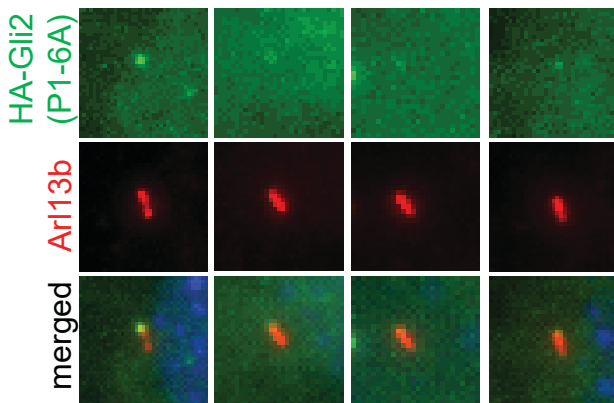

**F**

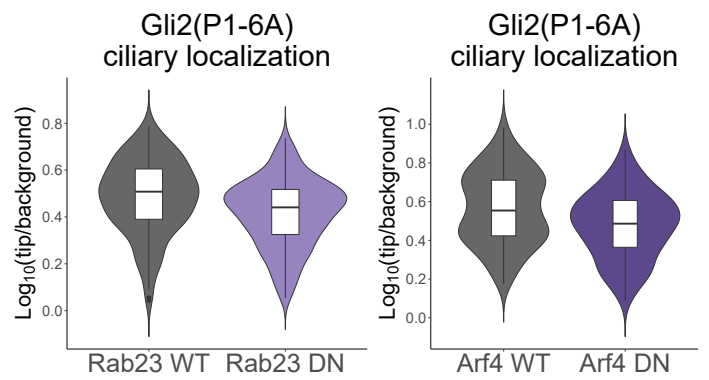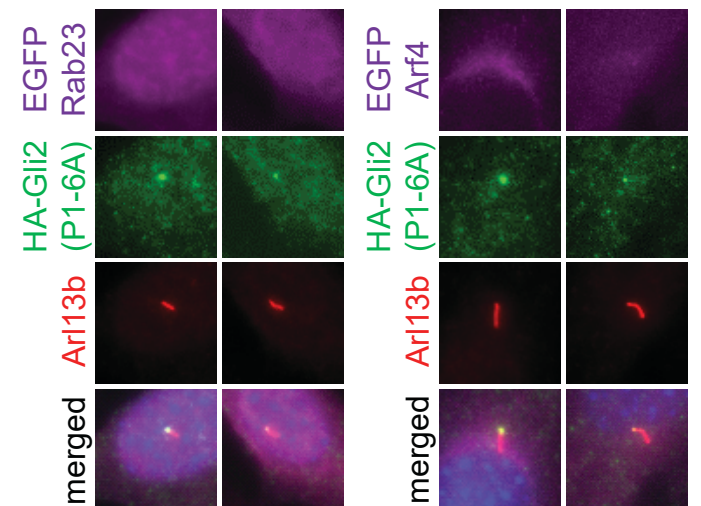



### Fig. 7 Rab14, Rab18, Rab23, and Arf4 mediate Gli2 ciliary trafficking into primary cilium

(A) Co-immunoprecipitation of EGFP tagged Rab and Arf proteins with HA-Gli2(P1-6A). HEK293T cells were co-transfected with the indicated constructs and co-IP was performed as in Fig. 2C (B) Knockdown efficiency of Rab14, Rab18, and Arf4 using shRNA. Cells were transduced with viral constructs encoding the indicated shRNAs and mRNA expression of their target genes was measured by qRT-PCR. Control cells were transduced with the shRNA against luciferase (C) Effect of Rab14, Rab18, and Arf4 shRNA knockdown on relative Gli2(P1-6A) ciliary localization. Relative localization of Gli2(P1-6A) at the cilium tip was measured as in Fig. 3C for  $n > 100$  cilia per group. Student's t-test control vs shRNA Rab14 p-value = 0.00018; control vs shRNA Rab18 p-value = 0.00027; control vs shRNA Arf4 p-value = 0.0081 (D) Representative images of HA-Gli2(P1-6A) localization in cilia of cells with the knockdown of Rab14, Rab18 and Arf4. Cells were transduced as in B. Arl13B was used as a ciliary marker (E) Effect of CRISPR-Cas9-mediated knockout of Rab14, Rab18, and Rab23 on Gli2(P1-6A) ciliary localization. Cells stably expressing both HA-Gli2(P1-6A) and Cas9 were transduced with viral constructs encoding the indicated sgRNAs. Control cells were transduced with the empty pLentiGuide-puro vector. Relative localization of Gli2(P1-6A) at the cilium tip was measured as in Fig. 3C for  $n > 280$  cilia per group. Student's t-test control vs Rab14 edit p-value =  $1.1e-06$ ; control vs Rab18 edit p-value  $< 2.2e-16$ ; control vs Rab23 edit p-value =  $3.4e-07$ . Representative images of Gli2(P1-6A) ciliary localization for each condition are presented below. Arl13b was used as a ciliary marker. (F) Effect of inducible expression of dominant-negative (DN) forms of Rab23 and Arf4 on Gli2(P1-6A) ciliary localization. Relative localization of Gli2(P1-6A) at the cilium tip was measured as in Fig. 3C for  $n > 100$  cilia per group. Student's t-test Rab23 WT vs DN p-value =  $2.2e-05$ ; Arf4 WT vs DN p-value = 0.00031. Representative images of Gli2(P1-6A) ciliary localization for each condition are presented below. Arl13b was used as a ciliary marker.

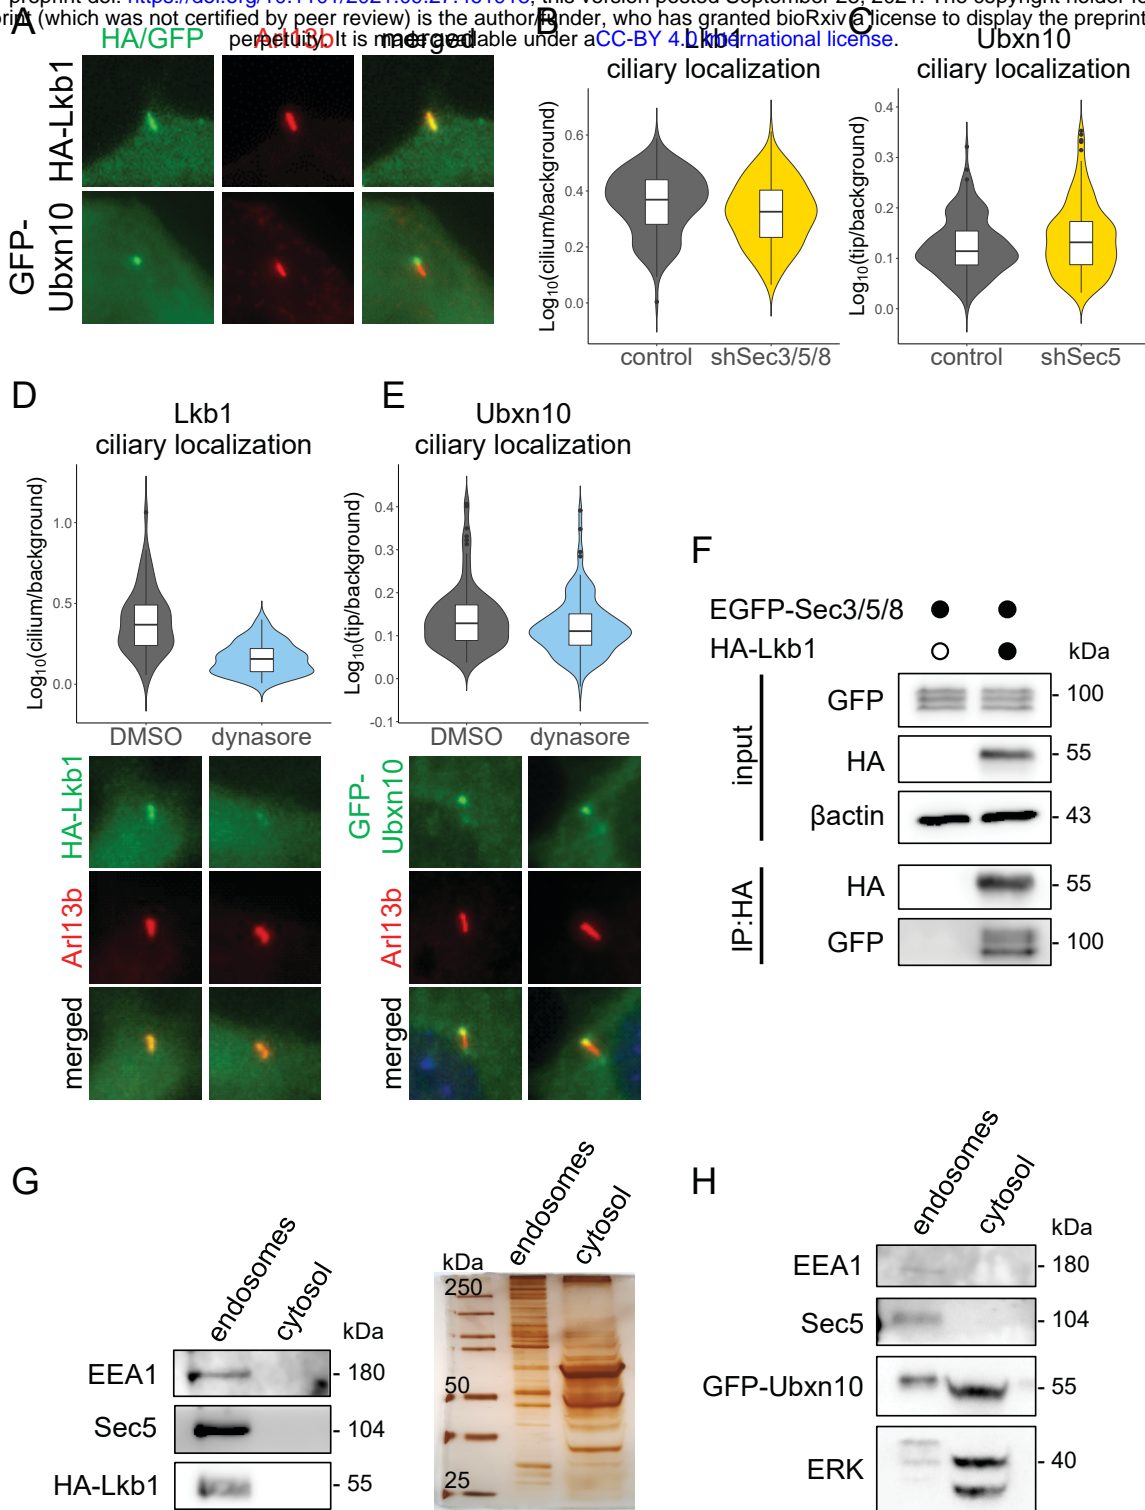

**Fig. 8 The trafficking of Lkb1, but not Ubxn10, depends on endocytosis and the exocyst**

(A) Ciliary localization of Lkb1 and Ubxn10 in NIH/3T3 cells. Cells were transfected and stained with the indicated antibodies. Arl13b was used as a ciliary marker. (B) Effect of Sec3/5/8 shRNA knockdown on Lkb1 ciliary localization. Cells were transduced as in Fig 3A. Relative localization of Lkb1 at the cilium tip was measured as in Fig. 3C for  $n > 70$  cilia per group. Student's t-test control vs shSec3/5/8 p-value = 0.003 (C) Effect of Sec5 shRNA knockdown on relative Ubxn10 ciliary localization. Cells were transduced as in Fig 3A. Relative localization of Ubxn10 at the cilium tip was measured as in Fig. 3C for  $n > 160$  cilia per group. Student's t-test control vs shSec5 p-value = 0.037 (D) Effect of dynasore treatment on Lkb1 ciliary accumulation. NIH/3T3 cells with stable expression of HA-Lkb1 were treated with DMSO and dynasore (4h; 40 $\mu$ M). Relative localization of Lkb1 at the cilium was measured for  $n > 50$  cells per group. Student's t-test p-value = 2.3e-11. Representative images are presented below. (E) Effect of dynasore treatment on Ubxn10 ciliary accumulation. Cells were treated as in B and relative localization was measured for  $n > 100$  cells per group. Student's t-test DMSO vs dynasore 4h p-value = 0.05. Representative images are presented below.

(F) Co-immunoprecipitation of EGFP tagged Sec3/5/8 proteins with HA-Lkb1 in HEK293T cells co-transfected with the indicated constructs (G) Cells stably expressing HA-Lkb1 were fractionated using the endosome isolation kit and the fractions were resolved using SDS-PAGE. Immunoblot shows Lkb1 in the endosomal fraction. EEA1 was used as a marker of the endosomes. Silver-stained gel of the same samples shows similar total protein abundance in both fractions. (H) Fractionation of stably expressed GFP-Ubxn10 cells as in G. Immunoblot shows Ubxn10 mainly in the cytosolic fraction. ERK was used as a cytosolic fraction marker.

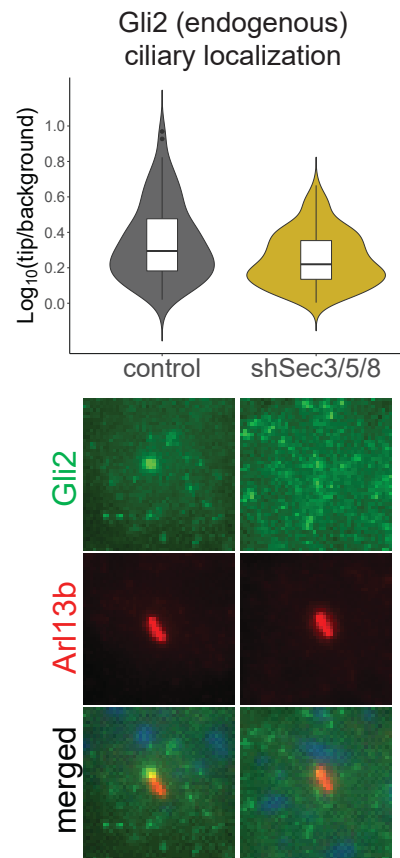

Figure S1. Relative localization at the cilium tip of endogenous Gli2 in NIH/3T3 cells with shRNA knock-down of Sec3, Sec5, and Sec8 and treated for 24h with SAG agonist. Results are presented as violin plots of log10-transformed ratios of fluorescence intensity of anti-HA staining at cilia tips to the intensity in the surrounding background. Cilia per variant  $n > 90$ . Student's t-test analysis control-shSec3/5/8 p-value = 0.0026. Representative images of Gli2 ciliary localization for each condition are presented below. Arl13b was used as a ciliary marker.

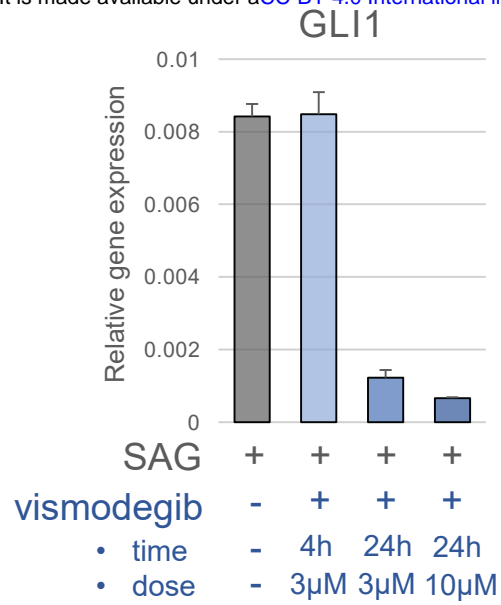

Figure S2 The relative mRNA expression level of Gli1 (Hh pathway activity marker) after indicated dose and time of vismodegib treatment.

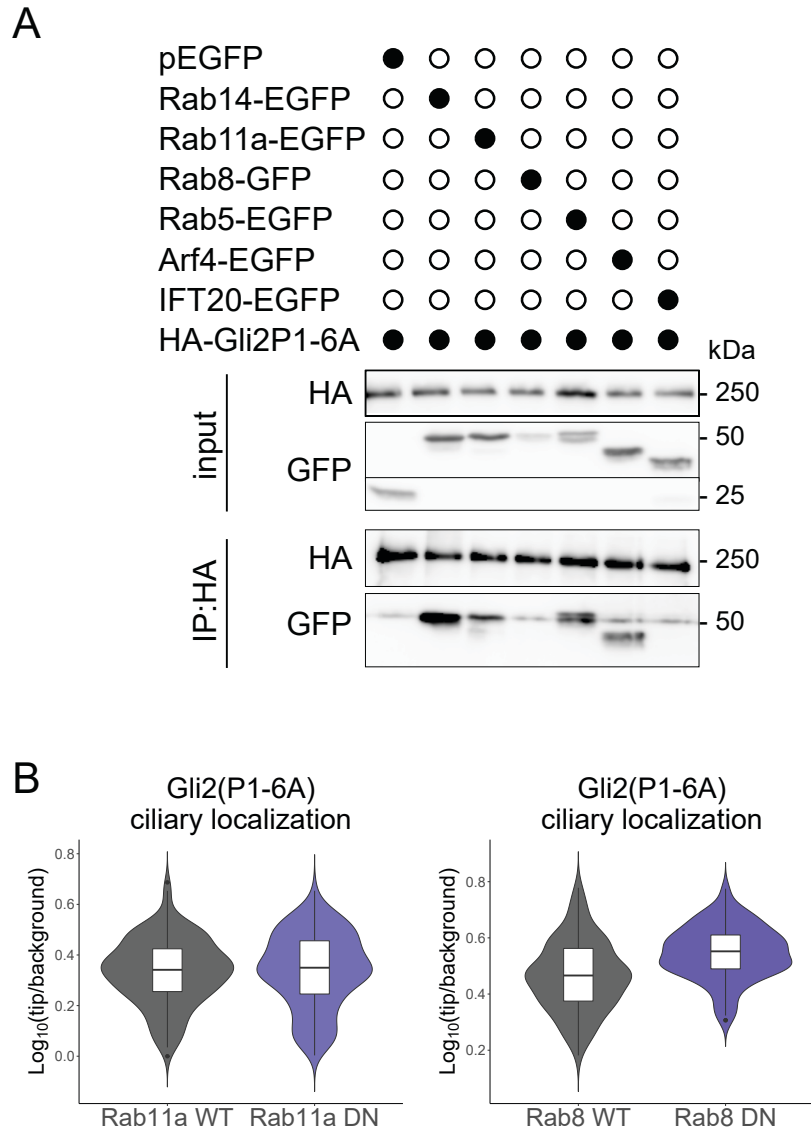

Figure S3 (A) Co-immunoprecipitation of EGFP tagged Rab, Arf, and IFT proteins with HA-Gli2(P1-6A). HEK293T cells were co-transfected with the indicated constructs and co-IP was performed using the HA beads. (B) Effect of inducible expression of dominant-negative (DN) forms of Rab8 and Rab11a on Gli2(P1-6A) ciliary localization. Relative localization of Gli2(P1-6A) at the cilium tip was measured as in Fig. 3C for  $n > 120$  cilia per group. Student's t-test Rab11a WT vs DN p-value = 0.70; Rab8 WT vs DN p-value = 2.5e-08.

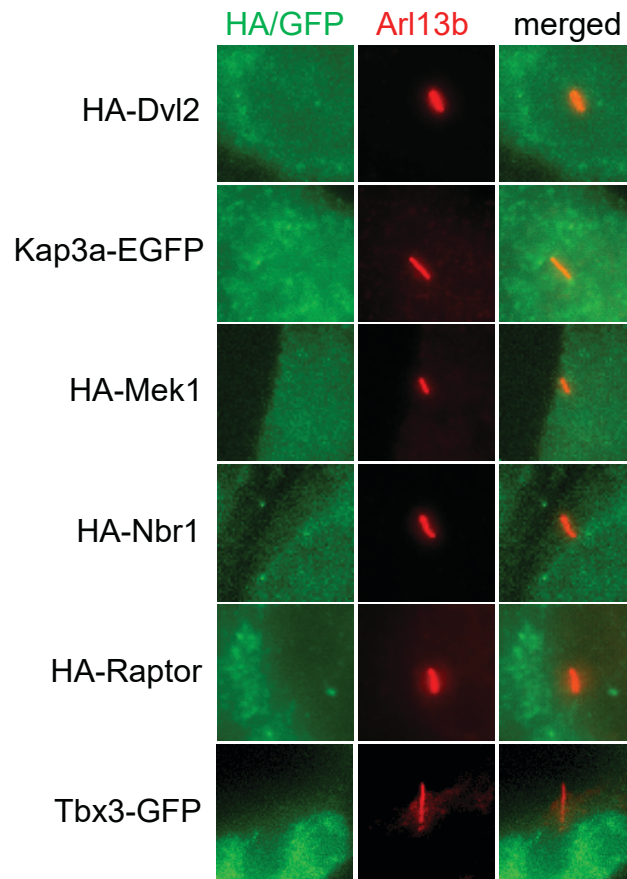

Figure S4 Ciliary localization of different putative ciliary proteins we tested in NIH/3T3 cells. Cells were transfected with indicated proteins tagged with HA or GFP and then we observed their ciliary localization. Arl13b was used as a ciliary marker.
